# Supplementary material for: Computational prediction of Pho regulons in cyanobacteria
Source: PubMed Central journal article supplement (PMC1906773; doi:10.1186/1471-2164-8-156), 2007-06-08
Supplement: 1471-2164-8-156-S1.pdf [file 1471-2164-8-156-S1.pdf]

Table 1s. Predicted Pho boxes for ATCC29413

| Rank | Transcription unit                           | Names                            | Pho Boxes                         | Position | Score | Annotation of the first gene in the transcription unit      |
|------|----------------------------------------------|----------------------------------|-----------------------------------|----------|-------|-------------------------------------------------------------|
| 1    | Ava_3741                                     | -                                | ATTAATAActtCTTAAGCcttaATTAACG     | -102     | 10.3  | hypothetical protein                                        |
| 2    | Ava_1501                                     | -                                | ATTAATTaactCTTTAACTggtCTTAACCT    | -318     | 9.97  | hypothetical protein                                        |
| 3    | Ava_3295                                     | -                                | TTTAATTGgtATTATCCTtccTTTAATCA     | -171     | 9.32  | hypothetical protein                                        |
| 4    | Ava_3265                                     | -                                | ATTAACCTttaATTAACCTtctaGTTAATGG   | -80      | 9.29  | Putative Ig                                                 |
| 5    | Ava_2944                                     | -                                | ATTATGATcaaGTTATAAAaacTTTAAACT    | -234     | 9.12  | Multi-sensor Signal Transduction Histidine Kinase           |
| 6    | Ava_4726                                     | -                                | ATTAATCTtttAATAATCTctcGATAAACA    | -116     | 9.11  | Na-Ca exchanger/integrin-beta4                              |
| 7    | Ava_2541                                     | <i>phoA</i>                      | GTTAATCTtcaGTTAACTTaaaTTTATATT    | -111     | 9.07  | alkaline phosphatase-like                                   |
| 8    | Ava_2252                                     | -                                | CTTAACATcgtCTTAACCCctgCTTGATGA    | -92      | 8.98  | hypothetical protein                                        |
| 9    | Ava_2176                                     | -                                | TTTTGCCTtggGTTAAGAGGaaCTTAACCT    | -123     | 8.96  | hypothetical protein                                        |
| 10   | Ava_2887 Ava_2886 Ava_2885 Ava_2884          | - - - -                          | TTTAACAATaatGTTAAGATattGTTAACTA   | -159     | 8.81  | hypothetical protein                                        |
| 11   | Ava_4516 Ava_4515 Ava_4514 Ava_4513 Ava_4512 | <i>pstS2 pstC2 pstA2 pstB2</i>   | TATTGTATatTTTAACTTgaaATTAACCA     | -403     | 8.75  | hypothetical protein                                        |
| 12   | Ava_5066 Ava_5065                            | --                               | TTTAATGTataCTTAACCTattGTTAACCT    | -38      | 8.74  | hypothetical protein                                        |
| 13   | Ava_3388                                     | -                                | ATTTGCCTattATTAATCTctaGATAATCT    | -487     | 8.68  | PEP-utilizing enzyme                                        |
| 14   | Ava_1819                                     | -                                | GTTAAGCcttaTTTAAAGTtctgGTTAATTA   | -42      | 8.67  | hypothetical protein                                        |
| 15   | Ava_4000                                     | -                                | GTTTGCAActtTTTAACTctgCTTATACA     | -95      | 8.62  | hypothetical protein                                        |
| 16   | Ava_2065                                     | -                                | ATTAATCAataTATAACCTgacGTTAACAC    | -239     | 8.62  | Twin-arginine translocation pathway signal                  |
| 17   | Ava_2477 Ava_2478 Ava_2479 Ava_2480          | <i>pstS1 pstC1, pstA1, pstB1</i> | TTTTTCCTtgtTTTAACTTtctGTTAACCT    | -66      | 8.54  | pstS1                                                       |
| 18   | Ava_1429                                     | -                                | TTTTAGGAagcTTTAAATAcacCTTACCTA    | -126     | 8.48  | Glycoside hydrolase, starch-binding                         |
| 19   | Ava_2324                                     | -                                | TTTAACAgagCTTAAAGCaacTTTGAAGT     | -128     | 8.45  | Two Component Transcriptional Regulator, LuxR family        |
| 20   | Ava_2432                                     | -                                | GTTAAACTggcATTAATTTacaGTTAAGAA    | -290     | 8.41  | hypothetical protein                                        |
| 21   | Ava_3667                                     | -                                | TTTAATGAaagCTTTCACCGcaATTTCAAG    | -252     | 8.4   | hypothetical protein                                        |
| 22   | Ava_0558                                     | -                                | ATTAGTATcaaCTTCTACTtcaCTTAAAGC    | -81      | 8.39  | hypothetical protein                                        |
| 23   | Ava_2500                                     | -                                | TGTAATTTctaCTTGAATGcgtCTTTATCA    | -165     | 8.37  | Rieske (2Fe-2S) region                                      |
| 24   | Ava_0990                                     | -                                | ATTAACTAataATTAATAactCTTAAAGG     | -79      | 8.35  | hypothetical protein                                        |
| 25   | Ava_0892 Ava_0891 Ava_0890                   | - - -                            | ATTTAAAAactCTTTATATtttATTAGTAA    | -186     | 8.35  | hypothetical protein                                        |
| 26   | Ava_4129                                     | -                                | TTTTACCTctcATTAATTTgaCTTAAACT     | -196     | 8.3   | hypothetical protein                                        |
| 27   | Ava_3716                                     | <i>sphX</i>                      | CTTTACTGataCATCAACTtttTTTGATGA    | -104     | 8.29  | hypothetical protein, sphX                                  |
| 28   | Ava_4785                                     | -                                | TATTAATAatgCTTAACACctcGTTACACT    | -61      | 8.28  | Peptidase M50                                               |
| 29   | Ava_2699                                     | -                                | TTTACCTtaaATTAAGGTTtaCTTAAACT     | -171     | 8.28  | hypothetical protein                                        |
| 30   | Ava_0064                                     | -                                | TTTAAAGAaatTTTGCGCCtgaCTTTACCT    | -480     | 8.28  | Signal Transduction Histidine Kinase                        |
| 31   | Ava_2230 Ava_2231                            | --                               | ATTATACAtaaCTTAGTCaagaCTTAGGTT    | -162     | 8.26  | hypothetical protein                                        |
| 32   | Ava_2778                                     | -                                | ATTTGGGaatCTTCATATattTTTACACT     | -522     | 8.26  | Integrins alpha chain                                       |
| 33   | Ava_4727                                     | -                                | GTTCTTTGaaCTTATTTtttCTTAATCT      | -122     | 8.17  | Glycerophosphoryl diester phosphodiesterase                 |
| 34   | Ava_0482 Ava_0481                            | --                               | CTTGAAAAaatCATCAACaaaATTAGCAA     | -82      | 8.17  | hypothetical protein                                        |
| 35   | Ava_3592 Ava_3593                            | --                               | CTTGACATtccATTTTGCTaatCTTATAAC    | -38      | 8.17  | Protein of unknown function DUF262                          |
| 36   | Ava_0968 Ava_0967                            | --                               | GTTAACAAtagGTTGAACatATTTAAGGG     | -21      | 8.14  | hypothetical protein                                        |
| 37   | Ava_2431 Ava_2430                            | --                               | CTTAACGTtaaATTAATGccagTTTAACTA    | -246     | 8.12  | FAD-dependent pyridine nucleotide-disulphide oxidoreductase |
| 38   | Ava_3624 Ava_3623                            | --                               | CTTACCTAaaaCCTAAGCTgagGTTGGTGT    | -123     | 8.12  | hypothetical protein                                        |
| 39   | Ava_4098 Ava_4097                            | --                               | ATTTGGAcgcATTGATCAtagCTTCAGCT     | -197     | 8.1   | hypothetical protein                                        |
| 40   | Ava_0548                                     | -                                | TTTTACGCcatGATACTCTgatTTTTACTA    | -510     | 8.1   | hypothetical protein                                        |
| 41   | Ava_2832 Ava_2831                            | --                               | TTTAAACAGtggtATTCAAATcctaCGTGATAG | -1       | 8.1   | Esterase/lipase/thioesterase                                |
| 42   | Ava_0785                                     | -                                | TTTATCTGaatATTAAGCTatCTTAAGCC     | -474     | 8.1   | hypothetical protein                                        |
| 43   | Ava_1820                                     | -                                | ATTAACCGAacTTTAAATaagCTTAACTG     | -136     | 8.08  | Pseudouridine synthase, Rsu                                 |
| 44   | Ava_1370                                     | -                                | ATTAACGTggaATTCGACGgaaCCTAAACC    | -352     | 8.07  | hypothetical protein                                        |
| 45   | Ava_4986                                     | -                                | ATTAATCTtttCTTTATCTtctCTCCATTC    | -650     | 8.06  | hypothetical protein                                        |
| 46   | Ava_3968                                     | -                                | TTTTACTTtttCTTTGTCacatTCTATTAA    | -69      | 8.06  | hypothetical protein                                        |
| 47   | Ava_4728                                     | <i>nucH</i>                      | TTTTACCTtttCCTATTATtctCTTAATCT    | -174     | 8.04  | Endonuclease/exonuclease/phosphatase                        |
| 48   | Ava_2698                                     | -                                | TTAAATCTaagTTTAAAGTAaacCTTAATTT   | -158     | 8.04  | hypothetical protein                                        |
| 49   | Ava_3614                                     | -                                | CTTTCAATcagTTTGTCTattTTTAAAGCT    | -36      | 8.04  | Oxidoreductase, molybdopter binding                         |
| 50   | Ava_4202                                     | -                                | GTTAAATTagaGTTAAAGTcggCTTTTCCC    | -11      | 8.01  | Protein of unknown function DUF820                          |
| 51   | Ava_4122 Ava_4123 Ava_4124                   | - - -                            | ATTAACAAAaatATTCAACGcatCTTAAAG    | -470     | 8.01  | hypothetical protein                                        |
| 52   | Ava_2524                                     | -                                | CTTAATTAaatCTTAATAAataATTCAAT     | -238     | 7.99  | Multi-sensor Signal Transduction Histidine Kinase           |
| 53   | Ava_1100                                     | -                                | TTTGTTCAtaaCTTCAATGcacTTTATACA    | -282     | 7.99  | hypothetical protein                                        |
| 54   | Ava_0789                                     | -                                | AATAAGGCataTTTAAAGCGataCATAGCAT   | -19      | 7.98  | hypothetical protein                                        |

Table 2s. Predicted Pho boxes for Aprime

| Rank | Transcription unit                                    | Names                        | Pho boxes                       | Position | Score | Annotation of the first gene in the transcription unit                           |
|------|-------------------------------------------------------|------------------------------|---------------------------------|----------|-------|----------------------------------------------------------------------------------|
| 1    | CYA_1732 CYA_1733 CYA_1734 CYA_1735 CYA_1736          | <i>pstS pstC pstA pstB</i> - | TTTTCTCTtgaCTTAACCCaaaGTTAACCT  | -69      | 11.04 | phosphate ABC transporter, phosphate-binding protein                             |
| 2    | CYA_1541                                              | -                            | CTTAACCTgggCATAACCTctcCTTTACTT  | -153     | 10.28 | transcriptional regulator, Crp/Fnr family                                        |
| 3    | CYA_1552 CYA_1553 CYA_1554 CYA_1555 CYA_1556 CYA_1557 | <i>pstS pstC pstA pstB</i> - | AATAACCTgaaTTAAACCTcttGTTAACCA  | -175     | 10.11 | phosphate ABC transporter, phosphate-binding protein                             |
| 4    | CYA_1696                                              | -                            | CTTAACCTgggCTTGGTCTctcCTTAACCT  | -135     | 10.10 | hypothetical protein                                                             |
| 5    | CYA_0900 CYA_0899                                     | --                           | CTTATATCTggTTAAAGTggcCATAGTTT   | -158     | 9.59  | nucleotidyltransferase domain protein                                            |
| 6    | CYA_2344 CYA_2343                                     | --                           | CTTTATGCcccGTTAACTCtaaTTAACCT   | -169     | 9.50  | hypothetical protein                                                             |
| 7    | CYA_2183                                              | -                            | GTTAAGTTcaaGCTAAAGTtcaATTGTTCT  | -246     | 9.21  | starch binding domain protein                                                    |
| 8    | CYA_2382 CYA_2383 CYA_2385                            | <i>chlL - chlN</i>           | CTTTAACCTgtTTTAGACTtccCTTAACCTC | -69      | 9.15  | light-independent protochlorophyllide reductase, iron-sulfur ATP-binding protein |
| 9    | CYA_1551 CYA_1550 CYA_1549 CYA_1548                   | <i>rplI dnaB</i> - -         | GTTAACAAgagGTTAAATTcagGTTATTTC  | -141     | 8.92  | ribosomal protein L9                                                             |
| 10   | CYA_0061 CYA_0060                                     | --                           | CTTCGTActtCTTCAAGTaggGTTGACCT   | -114     | 8.92  | RNA polymerase sigma-70 factor family                                            |
| 11   | CYA_1316                                              | -                            | CTTTGAGcatTTTGTAGAAacgCTTAAGCT  | -330     | 8.83  | DNA internalization competence protein, ComEC/Rec2 family                        |
| 12   | CYA_1625                                              | <i>eda</i>                   | TTTTAATTgcaATTAACCTtaaAATCAACC  | -51      | 8.73  | 2-dehydro-3-deoxyphosphogluconate aldolase/4-hydroxy-2-oxoglutarate aldolase     |
| 13   | CYA_2759                                              | -                            | TTTCAGCAaatCTTAGCCGcctCCTTAGCC  | -164     | 8.73  | cation transporter, P-type ATPase family                                         |
| 14   | CYA_0861 CYA_0863                                     | - <i>proC</i>                | GTTAAATTgtgATTAATTTtgTGTAAGC    | -533     | 8.72  | hypothetical protein                                                             |
| 15   | CYA_0781                                              | -                            | GTTATGAGacaGTTAAGAGataGTTAACGT  | -157     | 8.71  | alkaline phosphatase                                                             |
| 16   | CYA_2534 CYA_2533 CYA_2532 CYA_2531 CYA_2529          | -----                        | TTTGAGCGactGATAAACTtctCTTTTTAG  | -595     | 8.70  | cyclopropane-fatty-acyl-phospholipid synthase                                    |
| 17   | CYA_0220 CYA_0219                                     | <i>cpcA</i> -                | CTTTAAAGtctcCGTGAGATcgcCTAGATCC | -109     | 8.70  | phycocyanin, alpha subunit                                                       |
| 18   | CYA_2357 CYA_2356                                     | <i>petM panE</i>             | CTCAACCTctcCTTAAAAAcatGATGAGGA  | -474     | 8.66  | cytochrome b6-f complex, subunit VII                                             |
| 19   | CYA_1627                                              | -                            | GTTGATTTtaaGTTTAATTgcaATTAATAA  | -700     | 8.64  | peptidase, M23B family                                                           |
| 20   | CYA_1593 CYA_1594 CYA_1595                            | ---                          | ATTAATAAatgCTTAACCTacttGTTGCAAG | -19      | 8.58  | NAD(P)H dehydrogenase, subunit NdhF3 family                                      |
| 21   | CYA_1061                                              | -                            | TTTAAGGTtagGTCAGCGcagGTTAAGCT   | -356     | 8.54  | hypothetical protein                                                             |
| 22   | CYA_0664                                              | -                            | GTTAACCGgagACTTGCTTgttATTTTTGT  | -98      | 8.54  | hypothetical protein                                                             |
| 23   | CYA_0483                                              | -                            | CTTAAGCCcttcCATAACCTctgCCTAGGTG | -145     | 8.50  | GGDEF/FHA domain protein                                                         |
| 24   | CYA_0702                                              | -                            | GTTGAGCAgcccCTTCATTtettCTTGTCGG | -77      | 8.43  | polyA polymerase family protein                                                  |
| 25   | CYA_1688 CYA_1689 CYA_1690                            | -- <i>radC</i>               | TTTGATTGogaATTCAAGGcccCTTCAACG  | -213     | 8.38  | hypothetical protein                                                             |
| 26   | CYA_2305                                              | -                            | GTTAGCCGaggCTTAATCCtggGGTACCGT  | -724     | 8.35  | antioxidant, AhpC/TSA family                                                     |

Table 3s. Predicted Pho boxes for Bprime

| Rank | Transcription unit                                                                                                                                                         | Names                                                                                                        | Pho Boxes                        | Position | Score | Annotation of the first gene in the transcription unit           |
|------|----------------------------------------------------------------------------------------------------------------------------------------------------------------------------|--------------------------------------------------------------------------------------------------------------|----------------------------------|----------|-------|------------------------------------------------------------------|
| 1    | CYB_1915 CYB_1914 CYB_1913 CYB_1912 CYB_1911                                                                                                                               | <i>pstS pstC pstA pstB</i> -                                                                                 | TTTCTCTctgaCTTAACCCaaaGTTAACCT   | -67      | 10.96 | phosphate ABC transporter, phosphate-binding protein             |
| 2    | CYB_1988                                                                                                                                                                   | -                                                                                                            | CTTAATCTgagCTTAGTCTtctCTTAACCT   | -135     | 10.49 | hypothetical protein                                             |
| 3    | CYB_0684                                                                                                                                                                   | <i>phoD</i>                                                                                                  | GTAAACCcaacCTAACCCcaacCTTACCT    | -114     | 10.21 | alkaline phosphatase                                             |
| 4    | CYB_0159 CYB_0160 CYB_0161 CYB_0162 CYB_0163<br>CYB_0164 CYB_0165 CYB_0166 CYB_0167 CYB_0168                                                                               | <i>phnC phnD phnE - phnH<br/>phnI phnJ phnK phnL</i> -                                                       | CTTAACCTTggtTTTAACTTcagTATCAGGC  | -58      | 10.20 | phosphonate ABC transporter, ATP-binding protein                 |
| 5    | CYB_2221 CYB_2220                                                                                                                                                          | - -                                                                                                          | CTTAACCTggaCATAACCTTgcCTTTACTT   | -34      | 10.14 | hypothetical protein                                             |
| 6    | CYB_0246                                                                                                                                                                   | -                                                                                                            | TTTAATGCTgtTTTAATATcttCTTAACGT   | -120     | 9.98  | 4-hydroxyphenylpyruvate dioxygenase, putative                    |
| 7    | CYB_2465 CYB_2466                                                                                                                                                          | - -                                                                                                          | TTTAACCTTtttCTTTAACTTtttCTTTTGAA | -108     | 9.98  | sensor histidine kinase                                          |
| 8    | CYB_0245                                                                                                                                                                   | <i>pflB</i>                                                                                                  | GTTAAGAAGatATTA AACcagcATTA AAAA | -263     | 9.95  | formate acetyltransferase                                        |
| 9    | CYB_1898                                                                                                                                                                   | -                                                                                                            | ATTAACCTtacCTTCAGGtagCTTAATCT    | -121     | 9.50  | ABC transporter, ATP-binding protein                             |
| 10   | CYB_2765 CYB_2766                                                                                                                                                          | <i>nucH</i> -                                                                                                | CTTAAGCGtacCTTAACCTGcccCTTACTC   | -91      | 9.49  | endonuclease/exonuclease/phosphatase family protein              |
| 11   | CYB_2627                                                                                                                                                                   | -                                                                                                            | GTTACCCGtatCTTAACCCtttCTTACGCT   | -140     | 9.24  | hypothetical protein                                             |
| 12   | CYB_1079                                                                                                                                                                   | -                                                                                                            | GTAAATCgagGTTAAGCCcagGTTATCCT    | -133     | 9.20  | hypothetical protein                                             |
| 13   | CYB_1942 CYB_1941                                                                                                                                                          | - -                                                                                                          | TCTCAAActttGTTAAGGttaCTTAAACT    | -143     | 9.10  | electron transfer flavoprotein, beta subunit/FixA family protein |
| 14   | CYB_2516                                                                                                                                                                   | <i>napA</i>                                                                                                  | TTTGATGTgctTTTAAGTacttATTA AACG  | -129     | 9.04  | transporter, monovalent cation:proton antiporter-2 (CPA2) family |
| 15   | CYB_1351                                                                                                                                                                   | -                                                                                                            | TTTCAACTtttATTACCATctaTTTCAACT   | -229     | 9.01  | hypothetical protein                                             |
| 16   | CYB_1412                                                                                                                                                                   | -                                                                                                            | TTTAAGCCaagATTGACTGagtCTTTATTC   | -250     | 8.96  | GDSL-like lipase/acylhydrolase domain protein                    |
| 17   | CYB_1486                                                                                                                                                                   | -                                                                                                            | GTTGGTATcttTTT TAGATtatCTTAGAAG  | -98      | 8.84  | putative small GTP-binding protein                               |
| 18   | CYB_1198 CYB_1199                                                                                                                                                          | - -                                                                                                          | GTTAAGAGataGTTAAGAGataGTTAACAA   | -159     | 8.84  | alkaline phosphatase                                             |
| 19   | CYB_2597 CYB_2598 CYB_2599 CYB_2600 CYB_2601<br>CYB_2602 CYB_2603 CYB_2604 CYB_2605 CYB_2606<br>CYB_2607 CYB_2608 CYB_2609 CYB_2610 CYB_2611<br>CYB_2612 CYB_2613 CYB_2614 | <i>rplC rplD rplW rplB rpsS<br/>rplV rpsC rplP rpmC rpsQ<br/>rplN rplX rplE rpsH rplF<br/>rplR rpsE rplO</i> | CTTTCTTccaCTTGAGCTgccCTTACCCT    | -454     | 8.79  | ribosomal protein L3                                             |
| 20   | CYB_2662 CYB_2663                                                                                                                                                          | - -                                                                                                          | TTTCATCTcagCTTAACCTTgtCAAGAAAT   | -173     | 8.79  | ISSoc13, transposase orfA                                        |
| 21   | CYB_1325                                                                                                                                                                   | -                                                                                                            | TTTTATATcgaCTTAAGATagcATTATCGG   | -137     | 8.75  | hypothetical protein                                             |
| 22   | CYB_0689 CYB_0690                                                                                                                                                          | - -                                                                                                          | GTTACCCTccaATTAATCTccaATTAATTC   | -150     | 8.68  | hypothetical protein                                             |
| 23   | CYB_1747 CYB_1749                                                                                                                                                          | - <i>proC</i>                                                                                                | GTTAAATTgtgATTAAATTTtgTGTAAAGC   | -542     | 8.53  | hypothetical protein                                             |
| 24   | CYB_0102 CYB_0101 CYB_0099                                                                                                                                                 | - - -                                                                                                        | CCTCAGCTcagGTTAACCGaccCTTAGATT   | -318     | 8.53  | beta-carotene ketolase, putative                                 |
| 25   | CYB_2515                                                                                                                                                                   | -                                                                                                            | TTTAATAAGtaCTTAAAGcacATCAAATA    | -114     | 8.52  | serine/threonine protein kinase                                  |
| 26   | CYB_0572                                                                                                                                                                   | -                                                                                                            | TTTATCGAatgCTTAGCCAttcATTTTGTT   | -112     | 8.50  | putative bacteriochlorophyll 4-vinyl reductase                   |
| 27   | CYB_1147                                                                                                                                                                   | -                                                                                                            | TATGAACTtaaGTTAACATtgcCTTCCCCT   | -40      | 8.43  | glycosyl hydrolase, family 57                                    |
| 28   | CYB_2032                                                                                                                                                                   | -                                                                                                            | CTTCTCTCcaaATTAACGGaggCTTATCCA   | -165     | 8.42  | hypothetical protein                                             |
| 29   | CYB_2628 CYB_2629                                                                                                                                                          | <i>msrB</i> -                                                                                                | CGTAAAGAaggGTTAAGATacgGGTAACCT   | -93      | 8.36  | methionine-R-sulfoxide reductase                                 |

Table 4s. Predicted Pho boxes for BF-1

| Rank | Transcription unit                                                       | Names                                    | Pho boxes                       | Position | Score | Annotation of the first gene in the transcription unit             |
|------|--------------------------------------------------------------------------|------------------------------------------|---------------------------------|----------|-------|--------------------------------------------------------------------|
| 1    | <i>tlr0786</i>                                                           | -                                        | ATTAACCTaggATTAACCTattTTTAACCC  | -228     | 10.52 | hypothetical protein                                               |
| 2    | <i>tlr2164 tlr2165 tlr2166 tlr2167</i>                                   | <i>sphX pstC pstA pstB</i>               | TTTAAACAaacTTTTACCTtctCTTAACTT  | -23      | 9.91  | periplasmic phosphate-binding protein of phosphate ABC transporter |
| 3    | <i>tlr0711</i>                                                           | -                                        | CTTTGCCcgcCTTAACAGaatCTTAAACT   | -151     | 9.36  | D-lactate dehydrogenase                                            |
| 4    | <i>tlr0862</i>                                                           | -                                        | ATTAATCTattCTTAAACaaaTTTAATTC   | -123     | 9.16  | hypothetical protein                                               |
| 5    | <i>tsl0785</i>                                                           | -                                        | GTTAAGCTaggGTTAAAAatagGTTAATCC  | -35      | 8.95  | hypothetical protein                                               |
| 6    | <i>tsr1443 tlr1444 tlr1445 tlr1446 tlr1447</i><br><i>tlr1448 tlr1449</i> | - - <i>ycf63</i> - -<br><i>feoB cobl</i> | GATAGCAGtggATTAATTTcctTTTAACCT  | -130     | 8.94  | RNA binding protein                                                |
| 7    | <i>tlr1653</i>                                                           | <i>desC2</i>                             | ATTAAGAAagcGTTTACAGctgCTTCTGCC  | -49      | 8.85  | acyl-CoA desaturase 3                                              |
| 8    | <i>tll0860</i>                                                           | -                                        | ATTAATTTtggTTTAAGAAtagATTAATTT  | -669     | 8.81  | hypothetical protein                                               |
| 9    | <i>tlr0241 tlr0242 tlr0243</i>                                           | - - -                                    | GTTTATCGtgcCTTTAAATttaTTTACCTT  | -167     | 8.80  | hypothetical protein                                               |
| 10   | <i>tsl1609 tll1608</i>                                                   | - -                                      | TTTAATGActgAATTAACtTgaATTAACCTT | -114     | 8.74  | hypothetical protein                                               |
| 11   | <i>tll1774</i>                                                           | -                                        | GTTAAATAatcCTTAAATtcttTTTGATGG  | -384     | 8.72  | N-acetylmuramoyl-L-alanine amidase                                 |
| 12   | <i>tlr1157 tlr1158</i>                                                   | - -                                      | TTTAATGCagtCATAAACTtttGCTAAAGC  | -133     | 8.71  | hypothetical protein                                               |
| 13   | <i>tll2359</i>                                                           | <i>fus</i>                               | GTTAACCCtaaCTTAACGGttgTTTACAGC  | -149     | 8.66  | elongation factor EF-G                                             |
| 14   | <i>tlr0658 tlr0659</i>                                                   | - -                                      | GTTGACTCacaATTAACCCcgtCTTAGACA  | -110     | 8.64  | enolase                                                            |
| 15   | <i>tlr2169 tlr2170 tlr2171</i>                                           | - - -                                    | TTTTTGCAaatCTTGATCGaaaCTTAAACA  | -21      | 8.51  | cyanophycinase                                                     |
| 16   | <i>tlr0027 tlr0028</i>                                                   | - -                                      | CTTAACATcagTTTTGCCTataGTTATAGC  | -33      | 8.46  | hypothetical protein                                               |
| 17   | <i>tlr1930 tlr1931</i>                                                   | - -                                      | GTTTACATttcGTTACATTactCTTCAGTT  | -29      | 8.29  | putative glycosyl transferase                                      |
| 18   | <i>tsr0373 tlr0374 tsr0375</i>                                           | - - -                                    | CTGAAGCAagcCTTAATAGAaacCTTAATTT | -426     | 8.28  | hypothetical protein                                               |
| 19   | <i>tlr1853 tlr1854 tlr1855 tlr1856</i>                                   | - - - -                                  | GTTGTTCGctcTTTAGCTTggcCTTGATTG  | -24      | 8.18  | moaA/nifB/pqqE family protein                                      |
| 20   | <i>tll1025 tll1024 tll1023 tll1022 tll1021</i>                           | - - - - -                                | ATTTATAGactTTTAAAGCggcGGTTGTCT  | -56      | 8.16  | two-component response regulator                                   |
| 21   | <i>tlr2085</i>                                                           | -                                        | ATTAATGt taCATCAGCAtcaTTTCAAGG  | -55      | 8.15  | hypothetical protein                                               |
| 22   | <i>tll0141</i>                                                           | -                                        | TTTTATAGtcaGTTGTCAAttaATTGTCCT  | -228     | 8.12  | hypothetical protein                                               |
| 23   | <i>tlr2360</i>                                                           | -                                        | TGTAAACAaccGTTAAGTTaggGTTAACGT  | -24      | 8.11  | hypothetical protein                                               |
| 24   | <i>tlr1669</i>                                                           | -                                        | TGTGAAAAtaaCTTTATTAagaTTTATTAA  | -216     | 8.10  | hypothetical protein                                               |

Table 5s. Predicted Pho boxes for IMS101

| Rank | Transcription unit                             | Names                       | Pho boxes                       | Position | Score | Annotation of the first gene in the transcription unit                                       |
|------|------------------------------------------------|-----------------------------|---------------------------------|----------|-------|----------------------------------------------------------------------------------------------|
| 1    | <i>Tery_3845</i>                               | -                           | TTTAACCAaagCTTAAACGaaaTTTAAACC  | -173     | 10.12 | protein of unknown function DUF839                                                           |
| 2    | <i>Tery_0505 Tery_0506 Tery_0507 Tery_0508</i> | ----                        | CTTAAATAaatCGTAAATTAagGTTAAAAAT | -19      | 9.35  | protein of unknown function DUF124                                                           |
| 3    | <i>Tery_2377 Tery_2378</i>                     | --                          | ATTTACCAacgCTTAATTTttCTTAACCT   | -191     | 9.17  | efflux transporter, RND family, MFP subunit                                                  |
| 4    | <i>Tery_0988 Tery_0987</i>                     | --                          | ATTAACTAaacATTCAACTttaATTGACTT  | -330     | 8.89  | Ankyrin                                                                                      |
| 5    | <i>Tery_2737</i>                               | -                           | TTTAATGAtcaATTAATCATgcTTTAATCC  | -36      | 8.85  | hypothetical protein                                                                         |
| 6    | <i>Tery_5022</i>                               | -                           | CTTACTACataATTAACCTttaCTTAAACA  | -510     | 8.65  | Carboxymuconolactone decarboxylase                                                           |
| 7    | <i>Tery_4986 Tery_4987</i>                     | --                          | ATTTACTCtaaTTTCAGTTtttCTTATTCT  | -503     | 8.65  | TRAP transporter solute receptor, TAXI family                                                |
| 8    | <i>Tery_3566 Tery_3567 Tery_3568</i>           | ---                         | ATTAATAAatctTTTAGCTtatATTACTAT  | -278     | 8.61  | hypothetical protein                                                                         |
| 9    | <i>Tery_3016</i>                               | -                           | ATTTATCTtaaTTTAACCTagTttTACTAA  | -681     | 8.52  | Peptidoglycan glycosyltransferase                                                            |
| 10   | <i>Tery_3754 Tery_3753</i>                     | --                          | TTTATAAGtgcCTTAATCTttgCCTTAACT  | -19      | 8.38  | methytransferase FkbM family                                                                 |
| 11   | <i>Tery_3993</i>                               | -                           | CTTTATTTttaCTTACTTtatATTATAAA   | -82      | 8.37  | adenylate/guanylate cyclase                                                                  |
| 12   | <i>Tery_1101</i>                               | -                           | TTTTATGAtaaCTTAATTGataTTTAAAGT  | -49      | 8.36  | Insertion element protein                                                                    |
| 13   | <i>Tery_3826</i>                               | -                           | ATTAATAAactCTTAACCCaaaATTGAAA   | -27      | 8.33  | Dimethylaniline monooxygenase (N-oxide forming)                                              |
| 14   | <i>Tery_0813</i>                               | -                           | ACTATCCAttgTTTGACTTattCTTGATAA  | -118     | 8.33  | hypothetical protein                                                                         |
| 15   | <i>Tery_0406</i>                               | -                           | GTTAAGTTtagCTTGAATttatCTTGACAT  | -749     | 8.29  | formate dehydrogenase family accessory protein FdhD                                          |
| 16   | <i>Tery_1035</i>                               | -                           | ATTTCTCGaaaTTTAACCTAcaaCTTAGAAT | -68      | 8.26  | hypothetical protein                                                                         |
| 17   | <i>Tery_2828 Tery_2829</i>                     | --                          | TTTAACAGtaaTTTTAGCTcacATTAAAA   | -401     | 8.26  | Uncharacterized protein with protein kinase and helix-hairpin-helix DNA-binding domains-like |
| 18   | <i>Tery_2902</i>                               | <i>sphR</i>                 | GATAACCCaaaGTTAACCTtttCTTAACCT  | -337     | 8.26  | two component transcriptional regulator, winged helix family                                 |
| 19   | <i>Tery_3048</i>                               | -                           | TTTAACAAaatATTAACCTaggAATTAATA  | -247     | 8.21  | Cna B-type                                                                                   |
| 20   | <i>Tery_1874</i>                               | -                           | GTTTGAATttcATTAAGCAattAATATCCA  | -277     | 8.20  | cell surface protein                                                                         |
| 21   | <i>Tery_3534</i>                               | <i>sphx</i>                 | TTTGATATtttTTTAACCTggtCCTTAATCT | -164     | 8.18  | phosphate ABC transporter, periplasmic phosphate-binding protein                             |
| 22   | <i>Tery_2317</i>                               | -                           | TTTGACGAtgcCATAAATtttGTTAATTT   | -186     | 8.17  | hypothetical protein                                                                         |
| 23   | <i>Tery_2109</i>                               | -                           | ATTAATAAataTTTTACCTattATTACTAA  | -471     | 8.15  | AMP-dependent synthetase and ligase                                                          |
| 24   | <i>Tery_3699</i>                               | -                           | GTTAAGGAaagCTTAAAGTattTTTAAGCT  | -80      | 8.11  | amidophosphoribosyltransferase                                                               |
| 25   | <i>Tery_3585 Tery_3584 Tery_3583 Tery_3582</i> | ----                        | GTTATAAAacaTTTAAAGTaaCTTATTGG   | -141     | 8.11  | GCN5-related N-acetyltransferase                                                             |
| 26   | <i>Tery_4993 Tery_4994 Tery_4995 Tery_4996</i> | <i>phnD phnC phnE phnE2</i> | GAAACAAGtTTTTAACCTcttCTTAAACT   | -435     | 8.09  | phosphonate ABC transporter, periplasmic phosphonate-binding protein                         |
|      | <i>Tery_4997 Tery_4998 Tery_4999 Tery_5000</i> | <i>phnG phnH phnI phnJ</i>  |                                 |          |       |                                                                                              |
|      | <i>Tery_5001 Tery_5002 Tery_5003</i>           | <i>phnK phnL phnM</i>       |                                 |          |       |                                                                                              |
| 27   | <i>Tery_0622</i>                               | -                           | TTTAACATAaaTTTTACTtttTTTTAGAT   | -419     | 8.08  | hypothetical protein                                                                         |
| 28   | <i>Tery_2104</i>                               | -                           | CTTAAACTtttTTTGGTCAatcCTTACTCT  | -687     | 8.07  | hypothetical protein                                                                         |
| 29   | <i>Tery_4515 Tery_4514</i>                     | --                          | GTTAATCAttaCTTTTAAAgctCTTAACCT  | -655     | 8.04  | Carbohydrate-selective porin OprB                                                            |
| 30   | <i>Tery_2219</i>                               | -                           | CTTCAATAactATTAACCTcctCTTGAAAT  | -230     | 8.04  | hypothetical protein                                                                         |
| 31   | <i>Tery_3877</i>                               | -                           | TTTAAACTattTTTAAACTattTTAAGAT   | -600     | 8.03  | exonuclease SbcC                                                                             |
| 32   | <i>Tery_0420</i>                               | -                           | ATTATCAGggcTTTAACCAtttTTTCCCT   | -651     | 8.01  | Glyoxalase/bleomycin resistance protein/dioxygenase                                          |
| 33   | <i>Tery_2914</i>                               | -                           | TTTATTCTatgATTAATCAagtCTTCACCA  | -177     | 8.00  | short-chain dehydrogenase/reductase SDR                                                      |
| 34   | <i>Tery_4360</i>                               | -                           | TTTAATTAaattCTTAATTTtttTTTACTG  | -465     | 7.99  | hypothetical protein                                                                         |
| 35   | <i>Tery_3324</i>                               | -                           | TTTTTTACTtccCTAATCTcatCTTGCTTT  | -37      | 7.94  | hypothetical protein                                                                         |
| 36   | <i>Tery_2389 Tery_2388</i>                     | --                          | GTTAACCTaaaCTTATGTtaaGTTACCTA   | -52      | 7.94  | hypothetical protein                                                                         |
| 37   | <i>Tery_4221 Tery_4222</i>                     | --                          | ATTAATTTttcTTTAAAAAgagCTTTTCT   | -283     | 7.94  | PAS/PAC sensor signal transduction histidine kinase                                          |
| 38   | <i>Tery_4676 Tery_4677</i>                     | --                          | TTTTAAATataCTTAACCTaaaATTAATAT  | -330     | 7.93  | hypothetical protein                                                                         |
| 39   | <i>Tery_2787</i>                               | -                           | ATTAACCTactTTTAACCCaagATTGAGGT  | -175     | 7.91  | Ferritin and Dps                                                                             |
| 40   | <i>Tery_0345</i>                               | -                           | GTTAAATAtgCTTAAATAgatATTCATTA   | -612     | 7.89  | hypothetical protein                                                                         |
| 41   | <i>Tery_1792</i>                               | -                           | TTTGATTTggaCTTACTTggACTTACTC    | -127     | 7.89  | 3'(2),5'-bisphosphate nucleotidase                                                           |
| 42   | <i>Tery_2555</i>                               | -                           | ATTAGTAAatATTAATAGagtCTTTTGTT   | -486     | 7.88  | hypothetical protein                                                                         |

Table 6s. Predicted Pho boxes for PCC6301

| Rank | Transcription unit                                                 | Names                               | Pho boxes                       | Position | Score | Annotation of the first gene in the transcription unit                               |
|------|--------------------------------------------------------------------|-------------------------------------|---------------------------------|----------|-------|--------------------------------------------------------------------------------------|
| 1    | <i>syc0545_d</i>                                                   | <i>nucH</i>                         | TTTAAAGTgctGTTAATCcttcCTTTACCG  | -276     | 9.76  | hypothetical protein                                                                 |
| 2    | <i>syc1661_d syc1662_d syc1663_d syc1664_d syc1665_d syc1666_d</i> | <i>sphX pstS pstC pstA pstB pnp</i> | CTTAGGGTcgcCTTAATAGgctGTTAAACT  | -48      | 9.75  | periplasmic phosphate-binding protein of ABC transporter                             |
| 3    | <i>syc0699_c</i>                                                   | -                                   | GTTTAAACCTgaCTTAATTCtgATTGAATA  | -73      | 9.49  | hypothetical protein                                                                 |
| 4    | <i>syc0163_d</i>                                                   | <i>phoA</i>                         | TTTAACTAtttCATAATCTattCTCAATCT  | -216     | 9.41  | alkaline phosphatase                                                                 |
| 5    | <i>syc1524_c</i>                                                   | -                                   | GTTGATTTggcTTTAGTCTcctATTGATAT  | -21      | 9.25  | hypothetical protein                                                                 |
| 6    | <i>syc2253_d syc2254_d</i>                                         | <i>murF</i> -                       | ATTAACATagctTTATCTTggcATTAGTCA  | -90      | 9.18  | UDP-N-acetylmuramoylalanyl-D-glutamyl-2,6-diaminopimelate--D-alanyl-D-alanine ligase |
| 7    | <i>syc0685_c syc0684_c syc0683_c</i>                               | <i>pixG</i> - -                     | TTTAACTTggcCTTAATCTcgaAATAGGTA  | -85      | 9.08  | two-component response regulator rre36 homolog                                       |
| 8    | <i>syc1209_c</i>                                                   | -                                   | TTTAAAGCCcagCTTTAGCTcagCCTGGGAC | -84      | 8.95  | probable potassium channel protein                                                   |
| 9    | <i>syc1561_c</i>                                                   | -                                   | TTTCTGCGgtcCTTAAACGagcCTTCTAGT  | -34      | 8.93  | hypothetical protein                                                                 |
| 10   | <i>syc2437_c</i>                                                   | -                                   | TTTGACAGcttTTATCTAagaCTTATTCT   | -32      | 8.80  | rubrerythrin                                                                         |
| 11   | <i>syc1620_d</i>                                                   | -                                   | CTTCATTGagaCTTGACCTagcGCTTTGGT  | -122     | 8.68  | hypothetical protein                                                                 |
| 12   | <i>syc1747_d</i>                                                   | <i>cysR</i>                         | ATAGAAAaggaATTAACCAaacCTTAAAGT  | -71      | 8.64  | transcriptional regulator CRP family protein                                         |
| 13   | <i>syc0964_c</i>                                                   | -                                   | TTTCACTGagcCTTAACATtccCTTCGCGA  | -393     | 8.54  | hypothetical protein                                                                 |
| 14   | <i>syc2439_c</i>                                                   | -                                   | GCTCAACAtctTTTCAATGattCCTGAATA  | -94      | 8.51  | hypothetical protein                                                                 |
| 15   | <i>syc2138_d</i>                                                   | -                                   | CTTAACCGcttCTGAATCTaagCCTGCTAT  | -30      | 8.50  | hypothetical protein                                                                 |
| 16   | <i>syc1338_c</i>                                                   | <i>glnN</i>                         | TCTAATTTtctCTTCAAAAaggaATTTAAAT | -195     | 8.47  | glutamine synthetase type III                                                        |
| 17   | <i>syc1093_c</i>                                                   | <i>psbAI</i>                        | CTTAGCTAaaaATTAAGGGtttTTTACACC  | -79      | 8.35  | photosystem II D1 protein                                                            |
| 18   | <i>syc1447_d syc1448_d</i>                                         | - -                                 | GTTGGCACaaaATTCATCTtttACTAATCT  | -127     | 8.34  | hypothetical protein                                                                 |
| 19   | <i>syc1445_d</i>                                                   | -                                   | TTTAAAAAataCTTCTAAActcAATTCACA  | -513     | 8.26  | hypothetical protein                                                                 |
| 20   | <i>syc0023_d syc0024_d</i>                                         | - <i>ppk</i>                        | TTTTTGCCcatTTTAAATAactTTTGCTTT  | -583     | 8.21  | hypothetical protein                                                                 |
| 21   | <i>syc2044_d syc2045_d</i>                                         | <i>psaA psaB</i>                    | CCTGAAGctcTTTGAATtattGTTAATCG   | -277     | 8.20  | photosystem I P700 chlorophyll a apoprotein subunit la                               |
| 22   | <i>syc1030_d</i>                                                   | -                                   | TTTAAAGGAcagGATATGCTggTTTTACCA  | -307     | 8.15  | aldehyde dehydrogenase                                                               |
| 23   | <i>syc1953_c</i>                                                   | -                                   | TTTATCATtttATTGAGCTtcaCTTACAGA  | -511     | 8.07  | probable glutathione S-transferase                                                   |
| 24   | <i>syc1940_d syc1941_d</i>                                         | - -                                 | ATTTAAGAatgCTTGTCTtaaAGTTGAAA   | -21      | 8.05  | hypothetical protein                                                                 |
| 25   | <i>syc0266_c</i>                                                   | -                                   | CATGGCTCgagTTTTAGCTcttCATAACCT  | -170     | 8.05  | similar to S-layer-RTX protein                                                       |
| 26   | <i>syc0197_d syc0198_d syc0199_d syc0200_d</i>                     | - <i>phy</i> - -                    | GTTAAACTcccCCTAAGCAcctTCTAGCTC  | -45      | 8.02  | hypothetical protein                                                                 |
| 27   | <i>syc0467_c</i>                                                   | -                                   | TTTGAAAAattTTTATGGCTggATTAATCT  | -415     | 8.01  | cation-transporting ATPase PacL homolog                                              |
| 28   | <i>syc0006_c</i>                                                   | -                                   | CTTAACAAataATTAACCTccgTATTTTCG  | -33      | 7.99  | probable amidase                                                                     |
| 29   | <i>syc2462_d</i>                                                   | -                                   | TTTTATCAatgATTAATGAttgCTTTGGGA  | -376     | 7.96  | hypothetical protein                                                                 |
| 30   | <i>syc2384_c</i>                                                   | -                                   | TTTTACCAaatTTTGAGCTcagTTTTCGCG  | -113     | 7.96  | cell division protein Ftn6 hypothetical protein                                      |
| 31   | <i>syc1254_c</i>                                                   | -                                   | CTTGATAGctcTTTAGTCTagaTGTAACA   | -108     | 7.95  | hypothetical protein                                                                 |
| 32   | <i>syc0087_d</i>                                                   | -                                   | CTTAAATCcttTTTAGTGTcaaATTTTCTC  | -247     | 7.92  | hypothetical protein                                                                 |
| 33   | <i>syc1997_c</i>                                                   | -                                   | TGTTTACTttcATTGAAATaaaTTTCAGCT  | -192     | 7.90  | hypothetical protein                                                                 |

Table 7s. Predicted Pho boxes for PCC6803

| Rank | Transcription unit                             | Names                                 | PhoB boxes                      | Position | Score | Annotation of the first gene in the transcription unit |
|------|------------------------------------------------|---------------------------------------|---------------------------------|----------|-------|--------------------------------------------------------|
| 1    | <i>slI0679</i>                                 | <i>sphX</i>                           | TTTAACCAaacCTTTACTAgggCTTAACCT  | -105     | 10.31 | SphX protein precursor                                 |
| 2    | <i>slr1247 slr1248 slr1249 slr1250</i>         | <i>pstS2 pstC2 pstA2 pstB2</i>        | CTTAATTCtatCTTAATTTegaCTTAATCA  | -303     | 10.1  | periplasmic phosphate binding protein                  |
| 3    | <i>slI1552 slI0720</i>                         | - -                                   | CTTAATTTtaaTTTAACCTtaaTTTAATCT  | -698     | 9.817 | hypothetical protein                                   |
| 4    | <i>slI1555</i>                                 | -                                     | CTTAAATTTtcCGTAATCTcttCTTAAAGT  | -246     | 9.181 | hybrid sensory kinase                                  |
| 5    | <i>slr0753</i>                                 | <i>p</i>                              | CTTAATCAcggCTTAGTTTaatTTTAATCT  | -25      | 8.96  | P protein                                              |
| 6    | <i>slI1202 slI1203 slI1204</i>                 | - - -                                 | ATTAAAAGttaCTTGCTGTtttTTTAATGA  | -99      | 8.814 | hypothetical protein                                   |
| 7    | <i>slI0654 slI0656</i>                         | <i>phoA nucH</i>                      | CTTAACCTtttCATAGCTaacCATAAGTT   | -156     | 8.801 | alkaline phosphatase                                   |
| 8    | <i>slr1908</i>                                 | -                                     | GTTAAGTAaagGTTAAGGAtccGTTAAGCA  | -339     | 8.745 | hypothetical protein                                   |
| 9    | <i>slr2110 slr2111 slr2112 slr2113 slr2114</i> | - - - - <i>spsC</i>                   | TTTAAAGGgctTTTTTCTcttTATAACTA   | -137     | 8.681 | hypothetical protein                                   |
|      | <i>slr2115 slr2116 slr2117</i>                 | - <i>spsA</i> -                       |                                 |          |       |                                                        |
| 10   | <i>slr0793 slr0794 slr0795 slr0796</i>         | - - - <i>nreB</i>                     | TTTCACCTgaaTTTCATACcccCTTTGGCA  | -42      | 8.649 | hypothetical protein                                   |
| 11   | <i>slr0907 slr0909 slr0912 slr0913 slr0914</i> | - - - - -                             | CTTGACAGctTTTAACCAcagCTTAAGAG   | -335     | 8.634 | hypothetical protein                                   |
| 12   | <i>slI0741 slI0742 slI0743 slI0744 slI0745</i> | <i>nifJ</i> - - - <i>pfkA</i>         | TTTAAACTataGTTAATTTggcTGTAATTT  | -524     | 8.525 | pyruvate oxidoreductase                                |
| 13   | <i>ssr2333 slr1392</i>                         | - <i>feoB</i>                         | CTTTTCCAtagGTTGCATGgaaTTTAATCA  | -108     | 8.469 | hypothetical protein                                   |
| 14   | <i>slI0680 slI0681 slI0682 slI0683 slI0684</i> | <i>pstS1 pstC1 pstA1 pstB1 pstB1'</i> | ATTCATAgacCTTAACCTtccCTTTACCA   | -73      | 8.464 | phosphate-binding periplasmic protein precursor        |
|      | <i>slI0685</i>                                 | -                                     |                                 |          |       |                                                        |
| 15   | <i>slr0449</i>                                 | - -                                   | TTTTTCCTtgaCTTAAGTCaaaATAACCT   | -283     | 8.447 | DNR protein                                            |
| 16   | <i>slr1114 slr1115 slr1116 slr1117</i>         | - - - -                               | ATTTATTTtccATTATCTgagATTTATTT   | -190     | 8.398 | hypothetical protein                                   |
| 17   | <i>slI0676 ssl1277 slI0677 slI0678</i>         | - - - -                               | TTTAAAAGgtaATTTTTTAAAACTAAACT   | -333     | 8.395 | hypothetical protein                                   |
| 18   | <i>slI1876</i>                                 | <i>hemN</i>                           | GTTTATTTcaaTTTAATACTcttCTTTTGCA | -206     | 8.311 | oxygen independent coprophorphyrinogen III oxidase     |
| 19   | <i>slr1670 slr1672 slr1673 slr1674</i>         | - <i>glpK spoU</i> -                  | GTTAAGAttaCTTAACCCgtcAGTAAAAT   | -535     | 8.269 | hypothetical protein                                   |
| 20   | <i>slr1651</i>                                 | <i>hlyB</i>                           | ATTAATATAagATTAAATTaagGTTAAATT  | -100     | 8.244 | haemolysin secretion ATP-binding protein               |
| 21   | <i>slI1491</i>                                 | -                                     | TATAAAAAgacTTTAAGTAacgCTTATTAT  | -43      | 8.239 | beta transducin-like protein                           |
| 22   | <i>slI1169</i>                                 | -                                     | TGCAATAAtttTTTCACTAaatATTTATTT  | -597     | 8.236 | hypothetical protein                                   |
| 23   | <i>slr1068 slr1069 slr1070 slr1071 slr1072</i> | - - - - <i>yefA</i> -                 | TATAGAAGttaTTTATCCAaccgATTAACCA | -237     | 8.21  | hypothetical protein                                   |
|      | <i>slr1074 slr1075</i>                         | - -                                   |                                 |          |       |                                                        |
| 24   | <i>slI1849</i>                                 | -                                     | GTTAAAAGtaaCTTCTTAGcagAGTGATAA  | -60      | 8.207 | hypothetical protein                                   |
| 25   | <i>slr0222</i>                                 | -                                     | ATTTTCCTtgtCTTGATCAatgTTTGACCT  | -10      | 8.175 | hybrid sensory kinase                                  |
| 26   | <i>slr1181</i>                                 | <i>psbA1</i>                          | ATTAATCTgaaATTCAAGGgaaGTTAATCA  | -141     | 8.171 | photosystem II D1 protein                              |
| 27   | <i>slI1205</i>                                 | <i>pchR</i>                           | ATTGATCAattCTTTCAATctaCTTCAGCT  | -32      | 8.159 | regulatory protein; PchR                               |
| 28   | <i>ssr1562</i>                                 | -                                     | GTTGCAAaaacCTTAACAAaaaGTTTAGAG  | -128     | 8.137 | hypothetical protein                                   |
| 29   | <i>slI1525</i>                                 | <i>prk</i>                            | CTTGACAGgggGTTAACAAGccCATAGGCT  | -91      | 8.122 | phosphoribulokinase                                    |
| 30   | <i>slr1712</i>                                 | -                                     | TTCAACCAAttaCTTTGACTgaaTTTGATGC | -116     | 8.113 | hypothetical protein                                   |

Table 8s. Predicted Pho boxes for PCC7120

| Rank | Transcription unit                                                                                                                                     | Names                          | PhoB boxes                       | Position | Score | Annotation of the first gene in the transcription unit             |
|------|--------------------------------------------------------------------------------------------------------------------------------------------------------|--------------------------------|----------------------------------|----------|-------|--------------------------------------------------------------------|
| 1    | <i>alr0132</i>                                                                                                                                         | -                              | ATTAAAGTaatCTTTAACTagtCTTAACCT   | -330     | 9.96  | hypothetical protein                                               |
| 2    | <i>alr1170 alr1171</i>                                                                                                                                 | --                             | GTTAATTAacctCTTAATCcggtTTAATCT   | -327     | 9.68  | two-component response regulator                                   |
| 3    | <i>alr1386</i>                                                                                                                                         | -                              | AGTAACCTggtCTTACCTTgctCTTAACCTA  | -56      | 9.47  | hypothetical protein                                               |
| 4    | <i>all4382</i>                                                                                                                                         | -                              | TTTAACTTgttATTATCCTtccTTTAATCA   | -169     | 9.32  | hypothetical protein                                               |
| 5    | <i>alr5197 alr5198</i>                                                                                                                                 | --                             | CTTAACCTtgaATTAATGTtagTTAAACCC   | -286     | 9.31  | hypothetical protein                                               |
| 6    | <i>alr5291</i>                                                                                                                                         | <i>phoA</i>                    | ATTAATCTttaaGTTAACTgaaTTTATATT   | -223     | 9.25  | hypothetical protein                                               |
| 7    | <i>all2230 all2229 all2228 all2227</i>                                                                                                                 | <i>phnC - phnD phnE</i>        | TTTAGTATtttCTTAATTTtttATTAAACCG  | -45      | 9.14  | ABC transporter, ATP-binding component                             |
| 8    | <i>all0542</i>                                                                                                                                         | -                              | ATTATGATcaaGTTATAAAaacTTTAAACT   | -234     | 9.13  | two-component sensor histidine kinase                              |
| 9    | <i>alr4693</i>                                                                                                                                         | -                              | TTTGACGaacTTTAACTCattCTTTGCTT    | -309     | 9.00  | hypothetical protein                                               |
| 10   | <i>all4575 all4574 all4573 all4572</i>                                                                                                                 | <i>pstS1 pstC1 pstA1 pstB1</i> | TTTTCTCTtgaTTAACTttcGTTAACTT     | -64      | 8.97  | phosphate-binding periplasmic protein of phosphate ABC transporter |
| 11   | <i>all5196 all5195 all5194 all5193 all5192</i>                                                                                                         | -----                          | GTTAAACTaacATTAATTCaagGTTAAGTA   | -364     | 8.97  | hypothetical protein                                               |
| 12   | <i>alr4976</i>                                                                                                                                         | <i>phoD1</i>                   | CTTAACATcgtCTTAAACcctaCTTGATGA   | -86      | 8.89  | phosphodiesterase/alkaline phosphatase D                           |
| 13   | <i>alr3466</i>                                                                                                                                         | -                              | ATTTACAAcagTTTCAGCTtatTTTTACAA   | -407     | 8.83  | WD-40 repeat protein                                               |
| 14   | <i>all4085</i>                                                                                                                                         | -                              | ATTAAGCAataATTTATTtatCTTAAGAT    | -111     | 8.81  | endonuclease V                                                     |
| 15   | <i>all0471 all0470 all0469 all0468</i>                                                                                                                 | ----                           | TTTAACATAaatGTTAAGATtgcATTAACCTC | -158     | 8.80  | hypothetical protein                                               |
| 16   | <i>alr3397</i>                                                                                                                                         | -                              | ATTTTACTtatATTAATCTctaGATAATCT   | -364     | 8.80  | phosphoenolpyruvate synthase                                       |
| 17   | <i>alr1546</i>                                                                                                                                         | -                              | GATAAATAataATTAATCTtttCTTATCT    | -658     | 8.75  | hypothetical protein                                               |
| 18   | <i>all2006</i>                                                                                                                                         | -                              | TTTAATGTataCTTAACCTattGTTAACTT   | -38      | 8.74  | hypothetical protein                                               |
| 19   | <i>all0274</i>                                                                                                                                         | -                              | TTTAATCTtttGATAATCTtttGATAAATA   | -116     | 8.72  | hypothetical protein                                               |
| 20   | <i>all1750</i>                                                                                                                                         | -                              | GTTAAAAagatATTTACTAaccCCTAACCT   | -41      | 8.71  | hypothetical protein                                               |
| 21   | <i>alr3874</i>                                                                                                                                         | -                              | GTTAAGCttaaTTTAAAGTtcgGTTAATTA   | -44      | 8.68  | hypothetical protein                                               |
| 22   | <i>alr4794</i>                                                                                                                                         | -                              | ATTAATCAataTATAACCTgacGTTAACAC   | -239     | 8.62  | hypothetical protein                                               |
| 23   | <i>alr4823</i>                                                                                                                                         | -                              | CTTAATTAaaaTATAACCAaaaCTTAAAT    | -144     | 8.61  | hypothetical protein                                               |
| 24   | <i>all4220</i>                                                                                                                                         | -                              | ACTTAAAAataTTTAAAGTaaATTAATCC    | -191     | 8.50  | hypothetical protein                                               |
| 25   | <i>all0638 all0637</i>                                                                                                                                 | --                             | CTTTAAATaacGTTTATAAttgCTTTACCT   | -279     | 8.45  | two-component hybrid sensor and regulator                          |
| 26   | <i>alr0851</i>                                                                                                                                         | -                              | CTTTAGCTtccCGTAGGGTattTTTAATTA   | -17      | 8.44  | lysophospholipase                                                  |
| 27   | <i>asl0826 all0825 all0824 all0823 asl0822</i>                                                                                                         | -----                          | CCTAAACCcttATTTAAAGcagCTTAACTT   | -7       | 8.38  | hypothetical protein                                               |
| 28   | <i>all3564</i>                                                                                                                                         | -                              | CTTTACTTgaaCTTATCTataaATTATAAA   | -363     | 8.35  | hypothetical protein                                               |
| 29   | <i>alr0208</i>                                                                                                                                         | -                              | TTTCACCTtaaATTAAGTttaCTTAACCT    | -172     | 8.34  | hypothetical protein                                               |
| 30   | <i>alr2234</i>                                                                                                                                         | <i>phoD</i>                    | ATTAACCTtatCTTAGTCAacaATTAATTT   | -258     | 8.34  | phosphodiesterase/alkaline phosphatase D                           |
| 31   | <i>alr0430</i>                                                                                                                                         | -                              | ATTAACAAaatATTACCAttagATTGGATT   | -406     | 8.32  | hypothetical protein                                               |
| 32   | <i>alr2233</i>                                                                                                                                         | -                              | TTTTACCTttcATTAATTTtaCTTAAACT    | -195     | 8.31  | hypothetical protein                                               |
| 33   | <i>all1844</i>                                                                                                                                         | -                              | TATTAATAattgCTTAAACcttcGTTACACT  | -11      | 8.29  | hypothetical protein                                               |
| 34   | <i>all2704 all2703</i>                                                                                                                                 | --                             | TTTAAAGTctgTTTACTCaaaTTGAAATT    | -59      | 8.28  | hypothetical protein                                               |
| 35   | <i>alr1113 alr1114</i>                                                                                                                                 | --                             | ATTTAATTAaacTTTTAACTacaTTTAATAA  | -156     | 8.28  | ParA family protein                                                |
| 36   | <i>all5069</i>                                                                                                                                         | -                              | TTTAAATAgagCTTAAAGCaacATTGAAGT   | -128     | 8.27  | two-component response regulator                                   |
| 37   | <i>alr5224</i>                                                                                                                                         | -                              | TTTATTTCaatATTAATAAgctCTTTATCT   | -172     | 8.27  | hypothetical protein                                               |
| 38   | <i>alr1094 alr1095</i>                                                                                                                                 | <i>sphX gap3</i>               | CTTTACTAataCATCAACTtttATTGATGA   | -106     | 8.19  | periplasmic phosphate-binding protein of ABC transporter           |
| 39   | <i>all3132 all3131</i>                                                                                                                                 | --                             | ATTAACCAaaaGTTCTCCAtagTTTGCCAA   | -316     | 8.18  | ABC transport protein, ATP-binding subunit                         |
| 40   | <i>alr1677</i>                                                                                                                                         | -                              | ATTAACCTgttaaTTAAACGgtgGTTAAAAG  | -216     | 8.17  | hypothetical protein                                               |
| 41   | <i>all2550 all2549</i>                                                                                                                                 | --                             | CTTGAAAAaatCATCAACAaaaATTAGCAA   | -82      | 8.17  | hypothetical protein                                               |
| 42   | <i>all0275</i>                                                                                                                                         | -                              | GTTCTGTgaaCTTATTTtttCTTAATCT     | -122     | 8.17  | glycerophosphoryl diester phosphodiesterase                        |
| 43   | <i>asr2932 alr2933</i>                                                                                                                                 | --                             | GTTAACAAatagGTTGAACtatTTAAGGA    | -23      | 8.13  | hypothetical protein                                               |
| 44   | <i>alr1997 alr1998</i>                                                                                                                                 | --                             | GTTTCTGAgagTTTACTGetaGCTAACCT    | -227     | 8.11  | hypothetical protein                                               |
| 45   | <i>all1082</i>                                                                                                                                         | -                              | TTTAAAGTtgcCTTGACTGacaCATAATCA   | -288     | 8.11  | hypothetical protein                                               |
| 46   | <i>alr0169</i>                                                                                                                                         | -                              | TTCTAGCAaagCTTAATCAcaaCTTACCCG   | -126     | 8.11  | cyclomalto-dextrin glucanotransferase                              |
| 47   | <i>all1239</i>                                                                                                                                         | -                              | TTTTACGcCaatGATACTCTgatTTTTACTA  | -510     | 8.11  | hypothetical protein                                               |
| 48   | <i>all4118</i>                                                                                                                                         | -                              | TTTATCTGaatATTAAGCTtatCTTAAGCC   | -313     | 8.11  | hypothetical protein                                               |
| 49   | <i>alr3873</i>                                                                                                                                         | -                              | ATTAACCGaacTTTAAATaagcCTTAACTG   | -212     | 8.09  | hypothetical protein                                               |
| 50   | <i>asl0795 all0794</i>                                                                                                                                 | --                             | CTTTAGCGgggGTTTGTCTtgcCTTATTC    | -132     | 8.07  | hypothetical protein                                               |
| 51   | <i>alr0276</i>                                                                                                                                         | <i>nucH</i>                    | TTTTACCTtctCCTATTATtctCTTAATCT   | -178     | 8.05  | hypothetical protein                                               |
| 52   | <i>alr0528 alr0529 alr0530 asr0531 alr0532 cpcB cpcA cpcC cpcD cpcE</i><br><i>alr0533 alr0534 alr0535 alr0536 alr0537 cpcF cpcG1 cpcG2 cpcG3 cpcG4</i> |                                | TTTTTGCAactATTAATAaaaATAAAGAC    | -412     | 8.02  | phycocyanin beta chain                                             |
| 53   | <i>alr5272</i>                                                                                                                                         | -                              | CTTAATTAaatCTTAATAAaaaGTTTCAGT   | -238     | 8.00  | two-component sensor histidine kinase                              |
| 54   | <i>all1996 all1995 asl1994 asl1993</i>                                                                                                                 | ----                           | AGTTATGTtctCTTAATTTtgcATTGGTCT   | -131     | 7.99  | hypothetical protein                                               |
| 55   | <i>alr4525 alr4526 asr4527 alr4528 alr4529</i>                                                                                                         | -----                          | TTTATGTAtttCTTAATAAttaaTTAAAGC   | -107     | 7.98  | hypothetical protein                                               |
| 56   | <i>all2509</i>                                                                                                                                         | -                              | ATTCCTATtctCTTAAGCtgaTTTTTCG     | -601     | 7.98  | hypothetical protein                                               |
| 57   | <i>alr3823 alr3824</i>                                                                                                                                 | <i>radA</i>                    | TTTGAGCAataCTTAAGGAAAAATTAAGAT   | -38      | 7.97  | DNA repair protein                                                 |



Table 9s. Predicted Pho boxes for PCC7421

| Rank | Transcription unit                             | Names                               | PhoB boxes                      | Position | Score | Annotation of the first gene in the transcription unit                 |
|------|------------------------------------------------|-------------------------------------|---------------------------------|----------|-------|------------------------------------------------------------------------|
| 1    | <i>glr0275</i>                                 | -                                   | GTTAATCGcagGTTGACCTgctCTTAATCT  | -69      | 11.79 | hypothetical protein                                                   |
| 2    | <i>gll0490</i>                                 | <i>phoD</i>                         | CTTAACCAggaAATAAAGGggcATTAACGG  | -68      | 11.23 | phosphodiesterase/alkaline phosphatase D                               |
| 3    | <i>glr4430</i>                                 | -                                   | TTTTCACTatcATTAATCTtgtGTTAACCC  | -207     | 10.40 | hypothetical protein                                                   |
| 4    | <i>gll0367 gll0366 gll0365</i>                 | - - -                               | GTTTATCCTgaCGTAAACAtagCTTCAACT  | -76      | 9.92  | aquaporin Z                                                            |
| 5    | <i>gll0893</i>                                 | <i>phoA</i>                         | TTTAACCTTgaCTTAGTGGtttCATAATCT  | -146     | 9.89  | hypothetical protein                                                   |
| 6    | <i>gll3960</i>                                 | -                                   | CTTAACCGggcCTTCAACTgctCCTTACCT  | -34      | 9.84  | hypothetical protein                                                   |
| 7    | <i>glr2446</i>                                 | -                                   | ATTAATGCggcCTTAACGGgggATTATCCG  | -72      | 9.83  | hypothetical protein                                                   |
| 8    | <i>gll4200</i>                                 | -                                   | CTTAAACCaatAATAATATgaATTTTTC    | -186     | 9.69  | similar to cell surface glycoprotein (s-layer protein) related protein |
| 9    | <i>glr0280 glr0281 glr0282</i>                 | - - -                               | GTTAACCAgtgCTTATTCAtccGTTACGGG  | -81      | 9.61  | hypothetical protein                                                   |
| 10   | <i>glr4163 glr4164 glr4165 gvip549 gvip550</i> | - - - <i>secD secF</i>              | GTTGTCTTatgTTTTGAATCtttCTTAACTT | -140     | 9.57  | hypothetical protein                                                   |
| 11   | <i>glr0453 glr0454 glr0455 glr0456 glr0457</i> | - - - - -                           | TTTAAACAcgaCATAGAGAAAaaCCTAACAT | -714     | 9.52  | hypothetical protein                                                   |
|      | <i>glr0458 glr0459</i>                         | - -                                 |                                 |          |       |                                                                        |
| 12   | <i>gll3250</i>                                 | -                                   | GTTTAGAAAtacCTTAAGTCaccACTGAGCC | -631     | 9.37  | hypothetical protein                                                   |
| 13   | <i>gsr2660</i>                                 | -                                   | ATTAAGACctgCTTAACCTAatAATGTGTA  | -40      | 9.33  | hypothetical protein                                                   |
| 14   | <i>glr0997</i>                                 | -                                   | CTTAACCTatccTTTAACTGggtTTTGAGAC | -53      | 9.12  | hypothetical protein                                                   |
| 15   | <i>gll1281 gsl1280</i>                         | - -                                 | CTTGCCGggttATCAATCTcatGCTAACCT  | -39      | 9.07  | hypothetical protein                                                   |
| 16   | <i>glr3201</i>                                 | -                                   | GTTAACAAAtGTTCAACCGcctGTTAATGC  | -118     | 9.06  | hypothetical protein                                                   |
| 17   | <i>glr4413</i>                                 | -                                   | TTTAAACGaaaGTTAACTTcttTTTACCAT  | -143     | 9.06  | hypothetical protein                                                   |
| 18   | <i>glr0602</i>                                 | -                                   | CTTAAGGTtggCTTATGCTgcgTGAACTGT  | -82      | 8.97  | hypothetical protein                                                   |
| 19   | <i>gll2676 gll2675</i>                         | - -                                 | GTTAAGTTgacAATGCCGctcaTTTTACCC  | -89      | 8.93  | putative transposase                                                   |
| 20   | <i>gll3548</i>                                 | -                                   | GTTAGCTGatGTTTACTTcgcCATAACCT   | -71      | 8.91  | ribulose-phosphate 3-epimerase                                         |
| 21   | <i>gll2960</i>                                 | -                                   | GATTCATGcatATTAACGcttaGGTAATCC  | -642     | 8.90  | hypothetical protein                                                   |
| 22   | <i>gll2177</i>                                 | -                                   | TTTAAGGActcGTCATCTgagCTTTGTTT   | -40      | 8.90  | hypothetical protein                                                   |
| 23   | <i>glr2814</i>                                 | -                                   | TGCGATTGcgaATTAAGGTatcCTTAAATT  | -30      | 8.88  | hypothetical protein                                                   |
| 24   | <i>glr1552</i>                                 | -                                   | CTTTCGCGagcATTAATTCagtGTTATCCT  | -195     | 8.88  | serine/threonine kinase                                                |
| 25   | <i>gvip107 gvip108</i>                         | <i>rub ycf48</i>                    | AGTGAAGAgaaATTAAGTTtttCTTCATAT  | -30      | 8.87  | rubredoxin                                                             |
| 26   | <i>gll3053</i>                                 | -                                   | TTTGATGAaatCATGGACAagcGTTTCATGT | -33      | 8.79  | hypothetical protein                                                   |
| 27   | <i>glr4269</i>                                 | -                                   | TTTGACGGtaaTTAATATttcATAGAGGT   | -19      | 8.78  | hypothetical protein                                                   |
| 28   | <i>gvip499</i>                                 | <i>psbO</i>                         | ATTTGTCcattTTTCATTGcccTTTGCGCC  | -34      | 8.77  | similar to photosystem II manganese-stabilizing polypeptide            |
| 29   | <i>glr3061</i>                                 | -                                   | CTTAAACGgcaTTTATATCGaaaTTTATCCA | -114     | 8.72  | ammonium transporter                                                   |
| 30   | <i>gvip126 glr0944</i>                         | <i>hemG -</i>                       | TTTCGACCTcaCTTTATGCGcgATTATTCT  | -108     | 8.65  | protoporphyrinogen oxidase                                             |
| 31   | <i>glr0445 glr0446 glr0447 glr0448</i>         | <i>pstS pstC pstA pstB</i>          | GTTAACCTtgcCTTAATCGaatTTCGTTAC  | -80      | 8.64  | phosphate ABC transporter periplasmic phosphate-binding protein        |
| 32   | <i>glr2842 gsr2843 glr2844</i>                 | - - -                               | ATTTATTTaccGTTTAGACctcGATGGTCT  | -139     | 8.55  | hypothetical protein                                                   |
| 33   | <i>gll2550 gll2549</i>                         | - -                                 | ATTCATACTtaCTTGGAATataTGTTATGG  | -296     | 8.54  | 3-oxoacyl-(acyl-carrier-protein) reductase                             |
| 34   | <i>gll0074</i>                                 | -                                   | CTTACCCTatcCCTACTGCgcccTTAATCA  | -89      | 8.53  | hypothetical protein                                                   |
| 35   | <i>glr2447</i>                                 | -                                   | CTTAATGTcgcGATAGCCTtggGTTTACAC  | -72      | 8.51  | hypothetical protein                                                   |
| 36   | <i>gsr0742 glr0743</i>                         | - -                                 | TTTAGGTTtatTTTGATTcacaGTTAGGCC  | -100     | 8.51  | CAB/ELIP/HLIP superfamily protein                                      |
| 37   | <i>gll2466 gll2465</i>                         | - -                                 | GTTAGTGcttctTTTAGACCgcaATTCAAAA | -421     | 8.50  | probable glycosyltransferase                                           |
| 38   | <i>gll3924 gvip531 gvip530 gvip529 gvip528</i> | - <i>proA rpl22 rps3 rpl16</i>      | TTTCGGTTaaagTCAACGAagaCTTAATAT  | -147     | 8.48  | hypothetical protein                                                   |
|      | <i>gvip527 gvip526 gvip525 gvip524 gvip523</i> | <i>rpl29 rps17 rpl14 rpl24 rpl5</i> |                                 |          |       |                                                                        |
|      | <i>gvip522 gvip521 gvip520 gvip519 gvip518</i> | <i>rps14 rps8 rpl6 rpl18 rps5</i>   |                                 |          |       |                                                                        |
|      | <i>gvip517</i>                                 | <i>rpl15</i>                        |                                 |          |       |                                                                        |
| 39   | <i>gsl2445</i>                                 | -                                   | GATAATCCcccGTTAAGGCcgcATTAATTA  | -429     | 8.47  | hypothetical protein                                                   |
| 40   | <i>gll4412</i>                                 | - -                                 | GGTAAAAAgaaGTTAACTTtctTTTAAAGC  | -9       | 8.45  | hypothetical protein                                                   |
| 41   | <i>glr1387 glr1388 glr1389</i>                 | - - -                               | GTTTTATGgcaATTCACCTAagtGTTTACTA | -120     | 8.41  | hypothetical protein                                                   |
| 42   | <i>glr3251</i>                                 | -                                   | TTTTACACaaaTTTATTCTagaGCGAATGG  | -23      | 8.41  | hypothetical protein                                                   |
| 43   | <i>glr1205</i>                                 | -                                   | ATTTTGAAGcaTTTAAACGcttctTTTACTT | -43      | 8.40  | hypothetical protein                                                   |

Table 10s. Predicted Pho boxes for PCC7942

| Rank | Transcription unit                                     | Names                 | PhoB boxes                      | Position | Score | Annotation of the first gene in the transcription unit  |
|------|--------------------------------------------------------|-----------------------|---------------------------------|----------|-------|---------------------------------------------------------|
| 1    | <i>Synpcc7942_1000</i>                                 | <i>nucH</i>           | TTTAAAGTgctGTTAATCcttcCTTACCG   | -310     | 9.72  | hypothetical protein                                    |
| 2    | <i>Synpcc7942_2445 Synpcc7942_2444 Synpcc7942_2443</i> | <i>sphX pstS pstC</i> | CTTAGGGTcgcCTTAATAGgctGTTAAACT  | -46      | 9.71  | hypothetical protein                                    |
|      | <i>Synpcc7942_2442 Synpcc7942_2441</i>                 | <i>pstA pstB</i>      |                                 |          |       |                                                         |
| 3    | <i>Synpcc7942_0841</i>                                 | -                     | GTTTAAACtgaCTTAATTCtgcATTGAATA  | -75      | 9.45  | putative flavoprotein involved in K+ transport          |
| 4    | <i>Synpcc7942_1392</i>                                 | <i>phoA</i>           | TTTAACTAtttCATAATCTattCTCAATCT  | -214     | 9.37  | alkaline phosphatase                                    |
| 5    | <i>Synpcc7942_2586</i>                                 | -                     | GTTGATTTggcTTTAGTCTcctATTGATAT  | -23      | 9.21  | hypothetical protein                                    |
| 6    | <i>Synpcc7942_1841 Synpcc7942_1840</i>                 | - -                   | ATTAACATagcCTTATCCTggcATTAGTCA  | -88      | 9.15  | UDP-N-acetylmuramoylalanyl-D-glutamyl-2,6-diaminopir    |
| 7    | <i>Synpcc7942_0855 Synpcc7942_0856 Synpcc7942_0857</i> | - - -                 | TTTAACTTggcCTTAATCTcgaAATAGGTA  | -87      | 9.04  | response regulator receiver domain protein (CheY-like)  |
| 8    | <i>Synpcc7942_0303</i>                                 | -                     | TTTAAAGCCcagCTTAGCTcagCCTGGGAC  | -20      | 8.91  | response regulator receiver domain protein (CheY-like)  |
| 9    | <i>Synpcc7942_2550</i>                                 | -                     | TTTCTGCGgtcCTTAAACGagcCTTCTAGT  | -36      | 8.90  | hypothetical protein                                    |
| 10   | <i>Synpcc7942_1649</i>                                 | -                     | TTTGACAGcttTTTATCTAagaCTTATTCT  | -34      | 8.77  | rubrerythrin                                            |
| 11   | <i>Synpcc7942_1253</i>                                 | -                     | CTTAAACGgttCTTAAACCTaagGGTTAACC | -141     | 8.71  | hypothetical protein                                    |
| 12   | <i>Synpcc7942_2486 Synpcc7942_2485</i>                 | - -                   | CTTCATTGagaCTTGACCTagcGCTTGGT   | -120     | 8.65  | hypothetical protein                                    |
| 13   | <i>Synpcc7942_2356</i>                                 | -                     | ATAGAAAagaATTAACCAaacCTTAAAGT   | -84      | 8.60  | putative transcriptional regulator, Crp/Fnr family      |
| 14   | <i>Synpcc7942_1647</i>                                 | -                     | GCTCAACAtctTTTCAATGatCCTGAATA   | -96      | 8.47  | hypothetical protein                                    |
| 15   | <i>Synpcc7942_1957</i>                                 | -                     | CTTAAACGcttCTGAATCTaagCCTGCTAT  | -28      | 8.47  | cyclic nucleotide-binding domain (cNMP-BD) protein      |
| 16   | <i>Synpcc7942_1692</i>                                 | -                     | GTTGACGGcaaGTTAAGTaatTTTGCGAT   | -43      | 8.46  | mrr restriction system protein                          |
| 17   | <i>Synpcc7942_0169</i>                                 | <i>glnN</i>           | TCTAATTTtctCTTCAAAAgaATTTAAAT   | -197     | 8.43  | glutamate-ammonia ligase, glutamine synthetase type III |
| 18   | <i>Synpcc7942_0424</i>                                 | -                     | CTTAGCTAaaaATTAAGGGttTTTACACC   | -81      | 8.32  | photosystem q(b) protein                                |
| 19   | <i>Synpcc7942_0052 Synpcc7942_0051</i>                 | - -                   | GTTGGCACaaaATTCATCTtttACTAATCT  | -125     | 8.30  | hypothetical protein                                    |
| 20   | <i>Synpcc7942_0557</i>                                 | -                     | TTTCACTGagcCTTAACATtccCTTCGCGA  | -126     | 8.21  | hypothetical protein                                    |
| 21   | <i>Synpcc7942_1565 Synpcc7942_1566</i>                 | - -                   | TTTTTGCCcatTTTAAATAactTTTGCTTT  | -610     | 8.17  | hypothetical protein                                    |
| 22   | <i>Synpcc7942_2049 Synpcc7942_2048</i>                 | <i>psaA psaB</i>      | CCTGAAAGctcTTTGAATtattGTTAATCG  | -275     | 8.17  | photosystem I core protein PsaA                         |
| 23   | <i>Synpcc7942_1134</i>                                 | -                     | GTTGATGAgcaTTTCATTAactcCTTCACTT | -378     | 8.13  | hypothetical protein                                    |
| 24   | <i>Synpcc7942_0489</i>                                 | -                     | TTTAAGGAcacGATATGCTggtTTTACCA   | -305     | 8.11  | aldehyde dehydrogenase                                  |
| 25   | <i>Synpcc7942_2139</i>                                 | -                     | TTTATCATtttATTGAGCTtcaCTTACAGA  | -513     | 8.03  | probable glutathione S-transferase                      |
| 26   | <i>Synpcc7942_2152 Synpcc7942_2151</i>                 | - -                   | ATTTAAGAatgCTTGTCTtaaAGTTGAAA   | -19      | 8.02  | hypothetical protein                                    |
| 27   | <i>Synpcc7942_1357 Synpcc7942_1356 Synpcc7942_1355</i> | - - -                 | GTTAAACTcccCCTAAGCAcctCTAGCTC   | -43      | 7.99  | multi-sensor signal transduction histidine kinase       |

Table 11s. Predicted Pho boxes for CC9605

| Rank | Transcription unit                                                                                              | Names                 | PhoB boxes                      | Position | Score | Annotation of the first gene in the transcription unit         |
|------|-----------------------------------------------------------------------------------------------------------------|-----------------------|---------------------------------|----------|-------|----------------------------------------------------------------|
| 1    | <i>Syncc9605_2251</i>                                                                                           | -                     | CTTAAGGctgcGTTAATCtgcTTTAAcGT   | -121     | 11.49 | hypothetical protein                                           |
| 2    | <i>Syncc9605_1831 Syncc9605_1832 Syncc9605_1833</i>                                                             | ---                   | GCTGAACatttCTTAAcCTggtTTACACT   | -27      | 10.77 | possible high light inducible protein                          |
| 3    | <i>Syncc9605_2479</i>                                                                                           | -                     | GTTGATAtttTTTAAATGtgcATTTCGGCG  | -248     | 9.89  | conserved hypothetical protein                                 |
| 4    | <i>Syncc9605_2586</i>                                                                                           | -                     | CTTTCTTgatTTTCATCTaggTGTACTCT   | -79      | 9.67  | conserved hypothetical protein                                 |
| 5    | <i>Syncc9605_2524</i>                                                                                           | -                     | TTCAACTCgtaATTAACtAgccCTTAAAGA  | -370     | 9.43  | VCBS                                                           |
| 6    | <i>Syncc9605_1478 Syncc9605_1477 Syncc9605_1476</i>                                                             | ---                   | TTTCAACGcttCGTAAAGctgtATGAAGCG  | -53      | 9.33  | conserved hypothetical protein                                 |
| 7    | <i>Syncc9605_1396 Syncc9605_1395 Syncc9605_1394 Syncc9605_1393</i>                                              | ----                  | CTTTCTAgctATTAAGAacggCTTAAAGCG  | -56      | 9.26  | molecular chaperone DnaK, heat shock protein HSP70             |
| 8    | <i>Syncc9605_2373 Syncc9605_2372</i>                                                                            | --                    | CTAAACCTctgCTTAAcCTgctCTTCGCGC  | -21      | 9.26  | possible pectate lyase                                         |
| 9    | <i>Syncc9605_2166 Syncc9605_2167</i>                                                                            | --                    | TTTAAcCAcgcAATAATAaacACTATAAA   | -387     | 9.16  | hypothetical protein                                           |
| 10   | <i>Syncc9605_0307 Syncc9605_0306 Syncc9605_0305 Syncc9605_0304</i>                                              | ----                  | GATGAAGGcttCTTAAcAacagCTTCATCA  | -102     | 9.07  | photosystem q(b) protein                                       |
| 11   | <i>Syncc9605_0936 Syncc9605_0935</i>                                                                            | --                    | AGTAAcAagaaCTTAAcCctatTTTACGCT  | -465     | 8.97  | phage integrase family                                         |
| 12   | <i>Syncc9605_0444 Syncc9605_0443 Syncc9605_0442</i>                                                             | ---                   | AGTCGgACacaATTGATTgaggTTTATAAA  | -60      | 8.96  | phycobilisome linker polypeptide                               |
| 13   | <i>Syncc9605_0945</i>                                                                                           | -                     | CTTTATTAaatACTACcAggtTTTATCTA   | -222     | 8.96  | phage integrase family                                         |
| 14   | <i>Syncc9605_2579 Syncc9605_2578</i>                                                                            | --                    | TTTATAAAatcCTAATGtgcATCAAATG    | -130     | 8.92  | possible phycobilisome rod-core linker polypeptide (L-RC 28.5) |
| 15   | <i>Syncc9605_1164 Syncc9605_1165 Syncc9605_1166 Syncc9605_1167 Syncc9605_1168 Syncc9605_1169 Syncc9605_1170</i> | ---                   | ATTCAAATaatATTATAATtggTTAATTG   | -63      | 8.91  | hypothetical protein                                           |
| 16   | <i>Syncc9605_0770</i>                                                                                           | -                     | GTTACCTTcaaATTGAGTtgcgATTGCATT  | -4       | 8.84  | hypothetical protein                                           |
| 17   | <i>Syncc9605_1296 Syncc9605_1297 Syncc9605_1298 Syncc9605_1299</i>                                              | ----                  | GTTTAAAActtCATCATCctgcCGTAGATG  | -45      | 8.81  | hypothetical protein                                           |
| 18   | <i>Syncc9605_1584</i>                                                                                           | -                     | ATTAAGTatagCTTAAAGATcgaATCAAAAG | -358     | 8.77  | Flavodoxin, long chain                                         |
| 19   | <i>Syncc9605_1580 Syncc9605_1581</i>                                                                            | --                    | ATTAAAcAacaATTGAATgctgCCTGCCAA  | -165     | 8.59  | Ferredoxin (2Fe-2S)                                            |
| 20   | <i>Syncc9605_1758 Syncc9605_1757</i>                                                                            | --                    | CTTAAGGAttgCTTAATtGtctCATGGTGA  | -353     | 8.57  | conserved hypothetical protein                                 |
| 21   | <i>Syncc9605_2376 Syncc9605_2377</i>                                                                            | --                    | CATGAGAGgtaCTTCATGatccGTTACATG  | -70      | 8.54  | hypothetical protein                                           |
| 22   | <i>Syncc9605_0948</i>                                                                                           | -                     | CTTAATTTgttGATATCTtctgTTAAATG   | -558     | 8.53  | hypothetical protein                                           |
| 23   | <i>Syncc9605_1095</i>                                                                                           | -                     | CTTAACCgataCATAAAcGaccCTTGGCTA  | -101     | 8.50  | possible porin                                                 |
| 24   | <i>Syncc9605_1413</i>                                                                                           | -                     | TTTTCTGctagGTGAACAcgacCTTCAGGC  | -187     | 8.46  | conserved hypothetical protein                                 |
| 25   | <i>Syncc9605_1692 Syncc9605_1693 Syncc9605_1694 Syncc9605_1695</i>                                              | ----                  | CTTTACCTgggCTTCAGAGcgcCTATCCCG  | -86      | 8.45  | hypothetical protein                                           |
| 26   | <i>Syncc9605_1697 Syncc9605_1698</i>                                                                            | --                    | GTTAATGGgctCTTGCCCAgtgGTTCCCTGC | -150     | 8.43  | hypothetical protein                                           |
| 27   | <i>Syncc9605_1274</i>                                                                                           | -                     | AGGAAAATgcccCTTGATACaccCTTAAGTT | -292     | 8.41  | conserved hypothetical protein                                 |
| 28   | <i>Syncc9605_0148 Syncc9605_0147 Syncc9605_0146 Syncc9605_0145</i>                                              | ----                  | ATTCAATGccaAATAATCTggcATTGAATG  | -229     | 8.41  | hypothetical protein                                           |
| 29   | <i>Syncc9605_1756</i>                                                                                           | -                     | ATTTACAaaccGTTACAAGagcCTTAACAT  | -23      | 8.40  | possible high light inducible protein                          |
| 30   | <i>Syncc9605_1752</i>                                                                                           | -                     | CATAACCTtctCTTAATGagacGGCAACTT  | -39      | 8.39  | possible pectate lyase                                         |
| 31   | <i>Syncc9605_2395 Syncc9605_2394</i>                                                                            | --                    | GGTCAAGCctTTTAAAGGTtggTTTCACTT  | -13      | 8.39  | Carotene 7,8-desaturase                                        |
| 32   | <i>Syncc9605_0815</i>                                                                                           | -                     | ATTCATCActtTTTTATTAagtATTCAATTG | -159     | 8.38  | Glycogen debranching enzyme GlgX                               |
| 33   | <i>Syncc9605_0459</i>                                                                                           | -                     | GTTCACTTgctCATGAGCTgggTGTGATGA  | -512     | 8.37  | hypothetical protein                                           |
| 34   | <i>Syncc9605_1397 Syncc9605_1398 Syncc9605_1399 Syncc9605_1400</i>                                              | <i>pstC pstA pstB</i> | CTTAAGCcttCTTAATGActaGAAAAGGG   | -49      | 8.30  | Phosphate ABC transporter, permease protein PstC               |

Table 12s. Predicted Pho boxes for MED4

| Rank | Transcription unit                     | Names                  | Pho boxes                      | Position | Score | Annotation of the first gene in the transcription unit    |
|------|----------------------------------------|------------------------|--------------------------------|----------|-------|-----------------------------------------------------------|
| 1    | <i>PMM0577 PMM0576 PMM0575</i>         | - - -                  | CTTATTAAGaaATTAACTataaGTTAAATA | -21      | 9.28  | Putative type II alternative sigma factor, sigma70 family |
| 2    | <i>PMM1708 PMM1709 PMM1710</i>         | - <i>mraY</i> -        | ATTAGAAAataTTTAAATtttCTTTATCA  | -61      | 9.10  | hypothetical protein                                      |
| 3    | <i>PMM0335</i>                         | -                      | CTTAAATTTtaTTAAATTTatTTAATCT   | -277     | 8.97  | possible NADH-PLASTOQUINONE OXIDOREDUCTASE CHAIN 5 pir    |
| 4    | <i>PMM0127</i>                         | -                      | CTTCGATttgCTTAATAAttaCTTAATAA  | -220     | 8.89  | possible Signal peptide binding domain                    |
| 5    | <i>PMM0762 PMM0763 PMM0764 PMM0765</i> | <i>typA</i> - - -      | AATAAGCAttcTTGAGTtagcCTTAATAT  | -28      | 8.83  | tyrosine binding protein                                  |
| 6    | <i>PMM0709</i>                         | <i>som</i>             | ATTAATAGctaATTAATCTtctCTTAAACT | -241     | 8.58  | possible porin                                            |
| 7    | <i>PMM1167 PMM1166</i>                 | - -                    | TTTAAATataTTAGCATttaGTTAATTA   | -251     | 8.21  | Macrophage migration inhibitory factor family             |
| 8    | <i>PMM0744</i>                         | -                      | ATTCGTTgatATTTTCTtaaCTTAATCT   | -36      | 8.20  | hypothetical protein                                      |
| 9    | <i>PMM1495</i>                         | -                      | TTTCATATagaCTTAATTTtatATTTTAAA | -17      | 8.19  | hypothetical protein                                      |
| 10   | <i>PMM0999 PMM1000</i>                 | - -                    | ATTAGAAgataATTTATTatctCTTAGCTA | -28      | 8.16  | hypothetical protein                                      |
| 11   | <i>PMM1355 PMM1356</i>                 | - -                    | TTTTACTTtaaCTTAATCTataGTAGAGAT | -63      | 8.15  | hypothetical protein                                      |
| 12   | <i>PMM0735</i>                         | -                      | TTTAAGTAattATTACAAGgacCTTAAATT | -17      | 8.14  | hypothetical protein                                      |
| 13   | <i>PMM1416</i>                         | -                      | TTTATAAAAttaCTTAAATTTaaTTAACCC | -74      | 8.11  | hypothetical protein                                      |
| 14   | <i>PMM0710</i>                         | <i>pstS</i>            | TTTAACTAgccCTTAATCatttCTTATATT | -245     | 8.07  | ABC transporter, substrate binding protein, phosphate     |
| 15   | <i>PMM0708 PMM0707</i>                 | <i>phoA</i> -          | ATTTTTAAaacCTTAAATTgatCTTAATAA | -61      | 8.07  | putative secreted protein                                 |
| 16   | <i>PMM0348</i>                         | -                      | TTTGTAAGataTTGATTTgtaCTTAATTC  | -10      | 8.07  | possible Spectrin repeat                                  |
| 17   | <i>PMM1438 PMM1439</i>                 | <i>atpB atpC, atpE</i> | GTTAAGCAgcaATTAACCactCTTAACT   | -105     | 7.85  | ATP synthase beta subunit, central region:ATP synth...    |
| 18   | <i>PMM0989</i>                         | -                      | CTTTGAATtaaTTTTACATatcCTTACTCT | -167     | 7.81  | ATP/GTP-binding site motif A (P-loop)                     |
| 19   | <i>PMM1251 PMM1250</i>                 | - -                    | ATTGAAATgagTTTTATActctCTTAAAAA | -145     | 7.78  | Carbamoyltransferase                                      |

Table 13s. Predicted Pho boxes for MIT9312

| Rank | Transcription unit                                         | Names       | Pho boxes                       | Position | Score | Annotation of the first gene in the transcription unit               |
|------|------------------------------------------------------------|-------------|---------------------------------|----------|-------|----------------------------------------------------------------------|
| 1    | <i>PMT9312_0577 PMT9312_0576 PMT9312_0575</i>              | - - -       | CTTATTACTgaATTAACTAtaaGTTAAATA  | -20      | 9.29  | putative type II alternative sigma factor, sigma70 family            |
| 2    | <i>PMT9312_0289</i>                                        | -           | CTTTAAAAatgCCTGATATagaATTTATCC  | -30      | 9.24  | 2-amino-4-hydroxy-6-hydroxymethylidihydropteridine pyrophosphokinase |
| 3    | <i>PMT9312_0721</i>                                        | -           | GTTAATTAgTtctTTAACCTtctCTTAAAC  | -247     | 8.94  | porin precursor-like                                                 |
| 4    | <i>PMT9312_0129</i>                                        | -           | CTTTTGATtttATTAATTAtttCTAATAA   | -198     | 8.91  | signal peptide binding domain-like                                   |
| 5    | <i>PMT9312_1453 PMT9312_1454</i>                           | - -         | GTTCTTTAatcTTTACTTtaaCTTAATCT   | -62      | 8.78  | conserved hypothetical protein                                       |
| 6    | <i>PMT9312_1801 PMT9312_1802 PMT9312_1816</i>              | - - -       | ATAAAAAgtaTTTTAAATttcCTTTATCA   | -27      | 8.69  | conserved hypothetical protein                                       |
| 7    | <i>PMT9312_0709 PMT9312_0708</i>                           | - -         | TTTAAACTataTTTAAACTtttCTTGATTC  | -660     | 8.65  | DnaJ central domain protein (4 repeats)-like                         |
| 8    | <i>PMT9312_0722</i>                                        | <i>pstS</i> | TTTAAAGAgaaCTTAAACTtccCTTAAATT  | -231     | 8.49  | Periplasmic phosphate binding protein                                |
| 9    | <i>PMT9312_0356</i>                                        | -           | TTTTAGTTcttCTTAATTTagaTTTTAGA   | -185     | 8.18  | spectrin repeat protein-like                                         |
| 10   | <i>PMT9312_1179 PMT9312_1180</i>                           | - -         | TTTTATAAtacTTTTATTAagcCATTAACT  | -395     | 8.16  | adhesin-like protein                                                 |
| 11   | <i>PMT9312_0787 PMT9312_0788</i>                           | - -         | TTTTATTAAAATTTTAAACTaatCTTCTAGT | -18      | 8.06  | Phosphoribosylformylglycinamide synthetase PurS                      |
| 12   | <i>PMT9312_0340</i>                                        | -           | GTTTATTctctCATATTCagagCTTTTTTT  | -330     | 8.05  | NADH-plastoquinone oxidoreductase chain 5-like                       |
| 13   | <i>PMT9312_1588</i>                                        | -           | AATATTAAtatTTTTATATagaCTTAAGTT  | -17      | 7.87  | conserved hypothetical protein                                       |
| 14   | <i>PMT9312_0819</i>                                        | -           | CTTAATTGctaATTAAACAataATTCAAGT  | -334     | 7.87  | S1 RNA binding domain-like                                           |
| 15   | <i>PMT9312_0980</i>                                        | -           | CTTGAAGCagtATTTAAAAaatCTTAATTA  | -69      | 7.86  | conserved hypothetical protein                                       |
| 16   | <i>PMT9312_1550 PMT9312_1549 PMT9312_1548 PMT9312_1547</i> | - - - -     | TTTAATTGagaTTTGCCAagtCTTTTATT   | -208     | 7.85  | ATP synthase subunit 1-like                                          |
|      | <i>PMT9312_1546 PMT9312_1545 PMT9312_1544 PMT9312_1543</i> | - - - -     |                                 |          |       |                                                                      |
|      | <i>PMT9312_1542 PMT9312_1541 PMT9312_1540</i>              | - - - -     |                                 |          |       |                                                                      |
| 17   | <i>PMT9312_1007 PMT9312_1008</i>                           | - -         | AATAAATGataATTAATTAAtttATTAGCTA | -28      | 7.84  | conserved hypothetical protein                                       |
| 18   | <i>PMT9312_1135</i>                                        | -           | GTTTAAAAAtaCTTAATTCtataTTTATAAA | -134     | 7.80  | protein family PM-13                                                 |
| 19   | <i>PMT9312_0114 PMT9312_0115 PMT9312_0116</i>              | - - -       | TTTAATGTtttTTAAACTtagCTAAAAAA   | -33      | 7.75  | conserved hypothetical protein                                       |
| 20   | <i>PMT9312_1511 PMT9312_1510 PMT9312_1509 PMT9312_1508</i> | - - - -     | ATTTAAGAataATTAAGTAgtcCTTTACTT  | -329     | 7.70  | hypothetical protein                                                 |

Table 14s. Predicted Pho boxes for MIT9313

| Rank | Transcription unit     | Names       | Pho boxes                       | Position | Score | Annotation of the first gene in the transcription unit |
|------|------------------------|-------------|---------------------------------|----------|-------|--------------------------------------------------------|
| 1    | <i>PMT1985</i>         | -           | ATTAAGATtgtATTAATCTtccCTTAAGAC  | -26      | 10.55 | possible Pectate lyase                                 |
| 2    | <i>PMT1986 PMT1987</i> | - -         | CTTAAGGGAagATTAATACaatCTTAATTG  | -552     | 9.28  | conserved hypothetical protein in cyanobacteria        |
| 3    | <i>PMT0624</i>         | -           | ATCAACTtatCTTATTTAcaaATTTAGCA   | -455     | 9.02  | Uncharacterised protein family UPF0102                 |
| 4    | <i>PMT1046</i>         | <i>pcb</i>  | ATTATGGCaggGTTAATATtagCTTGATCT  | -587     | 8.93  | light-harvesting complex protein                       |
| 5    | <i>PMT1918 PMT1919</i> | - -         | TTTGGGCTcacCTTAAATtccgTATTACCA  | -15      | 8.91  | hypothetical protein                                   |
| 6    | <i>PMT0086</i>         | -           | TGTGAGACgtgATTTTTTTTcgcGTTAAGCT | -23      | 8.88  | Possible UDP-glucose-4-epimerase                       |
| 7    | <i>PMT1035</i>         | -           | ATTAATAGgttTTTAGGCTattTCTTAGGC  | -315     | 8.60  | hypothetical protein                                   |
| 8    | <i>PMT0851</i>         | -           | GTTAACATttaCTTAAGATgcaTTTGCGCA  | -751     | 8.55  | hypothetical protein                                   |
| 9    | <i>PMT0831 PMT0830</i> | - -         | TTTAGCCTtcCGTAAAGGgcaCTTAGTGC   | -386     | 8.50  | hypothetical protein                                   |
| 10   | <i>PMT0232</i>         | <i>hupE</i> | TTTATTCagcaATTAATTAgcaCTTAGCCA  | -250     | 8.45  | hypothetical protein                                   |
| 11   | <i>PMT1023 PMT1024</i> | - -         | CTAATTCTacgCTTAAGTAataCTTAAGCG  | -316     | 8.37  | hypothetical protein                                   |
| 12   | <i>PMT1984</i>         | -           | TTTCTCCTggtCTTTATCcttcCTTAGGAT  | -45      | 8.33  | hypothetical protein                                   |
| 13   | <i>PMT2212</i>         | -           | GTTAAATCtggCCTAGTCAaatCTTGACCT  | -117     | 8.27  | Class I peptide chain release factor                   |
| 14   | <i>PMT1098</i>         | -           | GTTGAGGTtcaCATTATGGgttTTTACTTG  | -418     | 8.22  | hypothetical protein                                   |
| 15   | <i>PMT1435</i>         | -           | TTTGATAAaccATTTGTCGctcGTTAACCT  | -160     | 8.22  | hypothetical protein                                   |
| 16   | <i>PMT0917</i>         | -           | ATTAAGGCTctGTTAGCAataGTTGGAG    | -444     | 8.13  | hypothetical protein                                   |
| 17   | <i>PMT2126 PMT2127</i> | - -         | TTTACACcgtCTTCCGGTtctTTTGGTTT   | -400     | 8.11  | Phage integrase                                        |
| 18   | <i>PMT1980</i>         | -           | CTTACTCTctgTTTAAACAcctCTTGGTGT  | -284     | 8.10  | hypothetical protein                                   |

Table 15s. Predicted Pho boxes for NATL2A

| Rank | Transcription unit                                            | Names                     | Pho boxes                       | Position | Score | Annotation of the first gene in the transcription unit |
|------|---------------------------------------------------------------|---------------------------|---------------------------------|----------|-------|--------------------------------------------------------|
| 1    | <i>PMN2A_0440</i>                                             | -                         | CTTAACCAaacCATTACCTaacTTTAGTCA  | -84      | 9.71  | hypothetical protein                                   |
| 2    | <i>PMN2A_0439 PMN2A_0438</i>                                  | <i>phoA</i> -             | CTTAACCTttttGCTAACCTttttTTTAACT | -69      | 8.81  | hypothetical protein                                   |
| 3    | <i>PMN2A_0249</i>                                             | -                         | CTTATTATttaTTTTATCTtttGTAAACT   | -64      | 8.61  | hypothetical protein                                   |
| 4    | <i>PMN2A_0435 PMN2A_0436 PMN2A_0437</i>                       | <i>Crp phoB phoR</i>      | TATAATCAtatGTTAAACAgtaTTAAGCT   | -69      | 8.16  | regulatory protein, Crp                                |
| 5    | <i>PMN2A_0549</i>                                             | -                         | TTTGAGCCtaaTTTCACCCattCTTATCTC  | -720     | 8.08  | hypothetical protein                                   |
| 6    | <i>PMN2A_0496</i>                                             | -                         | TTTAAATAacttCTTCTCTctaCTTTACAG  | -762     | 8.00  | hypothetical protein                                   |
| 7    | <i>PMN2A_0959</i>                                             | -                         | TTTGAATAaagTTTGAATAactTTTGATCT  | -151     | 7.80  | enzyme of the cupin superfamily                        |
| 8    | <i>PMN2A_0559</i>                                             | -                         | CTTAAAGCcctCTTTTGAaggCTTTTTTTT  | -171     | 7.79  | uncharacterized membrane protein                       |
| 9    | <i>PMN2A_0742</i>                                             | -                         | ATTCACCCcaTTTAATTAcagGCTGATCC   | -521     | 7.73  | protein family PM-12                                   |
| 10   | <i>PMN2A_1499</i>                                             | -                         | CTTAAGCGaagGTTACCAacaTTTAAAGA   | -56      | 7.65  | DNA repair protein RadA                                |
| 11   | <i>PMN2A_1369</i>                                             | -                         | TTTAATGActaCTTTTGCAaatTGTGACAT  | -287     | 7.54  | hypothetical protein                                   |
| 12   | <i>PMN2A_0714</i>                                             | -                         | ATTAACAGgatCTTTCTATttaTTTAAGAT  | -125     | 7.53  | MIF/phenylpyruvate tautomerase family protein          |
| 13   | <i>PMN2A_0311 PMN2A_0310 PMN2A_0309 PMN2A_0308 PMN2A_0307</i> | <i>pstC pstA pstB</i> - - | ATTAACCCtctCTTAGTGAAAAATTTGAAA  | -47      | 7.52  | hypothetical protein                                   |

Table 16s. Predicted Pho boxes for WH8102

| Rank | Transcription unit                                  | Names              | Pho boxes                       | Position | Score | Annotation of the first gene in the transcription unit             |
|------|-----------------------------------------------------|--------------------|---------------------------------|----------|-------|--------------------------------------------------------------------|
| 1    | <i>SYNW2391 SYNW2390</i>                            | <i>phoA1 phoA</i>  | TTTGATCagatCTTAAACTattCCTAACTT  | -59      | 11.18 | putative alkaline phosphatase                                      |
| 2    | <i>SYNW2294 SYNW2293</i>                            | - -                | CTTATAAAAAATTAACATacATTAATTG    | -131     | 10.22 | Possible glycosyltransferase                                       |
| 3    | <i>SYNW1664</i>                                     | -                  | TTTATAGCaaaTTTAAGAGtcaCTTTATTA  | -601     | 9.93  | hypothetical protein                                               |
| 4    | <i>SYNW0515 SYNW0516</i>                            | - -                | GTGGAATtagtTTTAAGTTgaTTTGGAT    | -121     | 9.74  | hypothetical protein                                               |
| 5    | <i>SYNW0443 SYNW0444 SYNW0445 SYNW0446 SYNW0447</i> | - - - - -          | ATTTACGTTtcTTTTTGCTttcTTTGTGC   | -234     | 9.67  | possible oxidoreductase, GFO/Ish/MocA family protein               |
|      | <i>SYNW0448 SYNW0449</i>                            | <i>neuB neuC</i>   |                                 |          |       |                                                                    |
| 6    | <i>SYNW1344</i>                                     | -                  | GTTGAACTcagCTTTATCCaatTTTACGCG  | -113     | 9.49  | hypothetical protein                                               |
| 7    | <i>SYNW1144</i>                                     | -                  | GTTTACGctttCTTAACCTtgcTGTGGTGC  | -516     | 9.40  | phage integrase family                                             |
| 8    | <i>SYNW2425 SYNW2426</i>                            | <i>gcvT aspS</i>   | CTTGACCaaagCTTCACCCagaTTTAAGCA  | -342     | 9.39  | putative Glycine cleavage T-protein (aminomethyl transferase)      |
| 9    | <i>SYNW0817 SYNW0816 SYNW0815</i>                   | <i>hli4 ubiH -</i> | AGGGAACAtttCTTAAACctggTTTACACT  | -25      | 9.13  | possible high light inducible protein                              |
| 10   | <i>SYNW0305 SYNW0306</i>                            | <i>ftsH2 -</i>     | CCTTAGGAcccGTTAAACAttcCTTCATCT  | -16      | 9.09  | hypothetical protein                                               |
| 11   | <i>SYNW0085</i>                                     | <i>swmA</i>        | ATCAATATctcCTTAAATtgaATTCACCT   | -370     | 9.04  | SwmA-cell surface protein required for swimming motility           |
| 12   | <i>SYNW0363 SYNW0364 SYNW0365</i>                   | - - -              | ATTAATGGaatGCTATTCTtagTTTATCGC  | -24      | 9.02  | hypothetical protein                                               |
| 13   | <i>SYNW2423</i>                                     | -                  | CTTAAGAGtttTTTTATCTTgacTTTATTGA | -105     | 8.99  | hypothetical, possible cyclic nucleotide-binding domain            |
| 14   | <i>SYNW1019</i>                                     | -                  | CTTGGACAAAaGTTAGACgggtCTTAACCG  | -27      | 8.97  | possible transcriptional regulator                                 |
| 15   | <i>SYNW0886 SYNW0885 SYNW0884 SYNW0883</i>          | - - - -            | GTTGATGTggtGTTTATCCgccCTCAATGG  | -105     | 8.95  | hypothetical protein                                               |
| 16   | <i>SYNW0894 SYNW0893 SYNW0892 SYNW0891</i>          | - - - -            | TATCAGCATggATTACCCGagaGATGAGCG  | -63      | 8.88  | hypothetical protein                                               |
| 17   | <i>SYNW0086 SYNW0087 SYNW0088</i>                   | <i>secA - -</i>    | GTGAATTCAaaTTTAAGGagatATTGATCG  | -151     | 8.81  | preprotein translocase SecA subunit                                |
| 18   | <i>SYNW1661</i>                                     | -                  | GTTGGTTGgtcTTTCATCAgaaGATCAACC  | -681     | 8.80  | hypothetical protein                                               |
| 19   | <i>SYNW1685</i>                                     | -                  | GTTGAACCaatCCTAAGGAgggGTCACCAG  | -29      | 8.80  | putative SMR family multidrug efflux transporter                   |
| 20   | <i>SYNW0848 SYNW0849</i>                            | - -                | ATTGCTAAatcaGTTAAGGAggtCTTGTGC  | -594     | 8.76  | hypothetical protein                                               |
| 21   | <i>SYNW0246</i>                                     | -                  | TTTCCAGaatTTTCAAGTcccCTTAACCA   | -15      | 8.71  | two-component sensor histidine kinase                              |
| 22   | <i>SYNW2257 SYNW2256</i>                            | <i>crtD crtB</i>   | GATCAGGCcctTTTAAGGTtggTTTCAACT  | -13      | 8.60  | hypothetical protein                                               |
| 23   | <i>SYNW0642 SYNW0641</i>                            | - -                | CTTTCCTAtcgATTGACTCggcATTAATAA  | -79      | 8.59  | hypothetical protein                                               |
| 24   | <i>SYNW0385</i>                                     | -                  | AGCCATCTgtatTTTAAATCagcGGTCACCT | -425     | 8.52  | hypothetical protein                                               |
| 25   | <i>SYNW0438</i>                                     | -                  | ATTAAGATgtaTTTAAACATctgATTTCAAA | -66      | 8.51  | possible polysaccharide deacetylase (xylanase, chitin deacetylase) |
| 26   | <i>SYNW1999 SYNW2000 SYNW2001</i>                   | <i>cpeC - cpeE</i> | CTTGATTGaggTTTATAAAgaaCACGTTCT  | -62      | 8.51  | phycobilisome linker polypeptide                                   |
| 27   | <i>SYNW0373 SYNW0372</i>                            | - -                | ATTATACTcaaATTTACAGacaAATAAGTG  | -4       | 8.51  | hypothetical protein                                               |
| 28   | <i>SYNW0984</i>                                     | <i>expE1</i>       | CTTAGGCCttcATTATCGAcctCTCCAATT  | -55      | 8.51  | putative secreted calcium-binding protein                          |
| 29   | <i>SYNW0360</i>                                     | -                  | GTTTAGGCatcGTTGAACTaaaCTAAAGGA  | -457     | 8.49  | weak similarity to phage integrase family                          |
| 30   | <i>SYNW1533</i>                                     | <i>gshR</i>        | CTTCACGTgtcCTTGAGCCaatCTTGCTCA  | -106     | 8.47  | probable glutathione reductase (NADPH)                             |
| 31   | <i>SYNW2476 SYNW2475</i>                            | - <i>cobA</i>      | TTTAAATCTgaTGTAAAACtctGTTACAGCA | -309     | 8.47  | possible DNA mismatch repair proteins, mutS fa                     |
| 32   | <i>SYNW0450 SYNW0451 SYNW0452 SYNW0453 SYNW0454</i> | - - - - -          | CTTAAATTCggCTTAAGTCAatTTAGTAAA  | -236     | 8.46  | putative sugar-phosphate nucleotide transferase                    |
|      | <i>SYNW0455 SYNW0456 SYNW0457 SYNW0458 SYNW0459</i> | - - - - -          |                                 |          |       |                                                                    |
|      | <i>SYNW0460 SYNW0461</i>                            | - -                |                                 |          |       |                                                                    |
| 33   | <i>SYNW2489</i>                                     | -                  | CATCAAGTtgaTTTTAGACataTTTAAGAT  | -603     | 8.45  | hypothetical protein                                               |
| 34   | <i>SYNW0165</i>                                     | -                  | GTTAATAGatgCCTAATTTtttTTGGTCTG  | -310     | 8.44  | hypothetical protein                                               |
| 35   | <i>SYNW0440 SYNW0441</i>                            | - -                | GTTAAGCAcagATTGTGCAatTTTCATGT   | -303     | 8.43  | hypothetical protein                                               |
| 36   | <i>SYNW0389</i>                                     | -                  | TTTGATCagccCGTCATCTaaaTTTATTG   | -88      | 8.39  | hypothetical protein                                               |
| 37   | <i>SYNW2228</i>                                     | -                  | CTTTACCAaggGTTAACCAataATCCCTGT  | -109     | 8.37  | hypothetical protein                                               |
| 38   | <i>SYNW1563</i>                                     | -                  | ATTGAGTTgttCCTGAACTagaATTTAGTT  | -21      | 8.37  | hypothetical protein                                               |
